# Supplementary material for: CRISPR-Cas12a exploits R-loop asymmetry to form double-strand breaks
Source: eLife. 2020 Jun 10;9:e55143. doi: 10.7554/eLife.55143 (PMC7286691; doi:10.7554/eLife.55143)
Supplement: Appendix 1—figure 1—source data 1. [file elife-55143-app1-fig1-data1.xlsx]

## Sheet: Appendix 1—figure 1—FS1
Appendix 1—figure 1—figure supplement 1
Top row:
AsCas12a			S1 nuclease
[each holoenzyme component] (nM)	Fraction cleaved		[S1 nuclease] (U/µL)	Fraction cleaved
0	0		0	0
12.5	0.0180768		0.00262144	0.0167836
18.75	0.0403557		0.0065536	0.0606049
25	0.207589		0.016384	0.253934
37.5	0.401007		0.04096	0.417327
50	0.669326		0.1024	0.716409
75	0.817833		0.256	0.758495
100	0.86796		0.64	0.912012
150	0.945877		1.6	0.97249
200	0.981202		4	0.993254
Bottom panel:
	AsCas12a	S1 nuclease
a	0.969662	0.849773
b	0.021157	0.553425
c	0.0828439	0.648828
d	0.101759	0.676943
e	0.197009	0.680024
f	0.183005	0.823733
g	0.0219922	0.512632
h	0.0114494	0.471251
i	0.0190222	0.506445
j	0.0135532	0.491515
k	0.0121709	0.498858
l	0.0229734	0.664998
