# Supplementary material for: CRISPR-Cas12a exploits R-loop asymmetry to form double-strand breaks
Source: eLife. 2020 Jun 10;9:e55143. doi: 10.7554/eLife.55143 (PMC7286691; doi:10.7554/eLife.55143)
Supplement: Appendix 2—figure 1—source data 1. [file elife-55143-app2-fig1-data1.xlsx]

## Sheet: Appendix 2—figure 1
Appendix 2—figure 1A
Radiolabel TS 5'	AVERAGES	Time (s)									REP1	Time (s)									REP2	Time (s)									REP3	Time (s)
	Dinucleotide	0	5	10	20	40	80	600	3600		Dinucleotide	0	5	10	20	40	80	600	3600		Dinucleotide	0	5	10	20	40	80	600	3600		Dinucleotide	0	5	10	20	40	80	600	3600
	22/23	0	0.00634618	0.0342621	0.0633039	0.0773566	0.079477	0.0845358	0.0860327		22/23	0	0.00308591	0.0210824	0.0564952	0.0691279	0.0734175	0.0799323	0.0778786		22/23	0	0.00320203	0.036593	0.0743222	0.0814344	0.0808786	0.0843911	0.088598		22/23	0	0.0127506	0.0451109	0.0590942	0.0815076	0.0841348	0.0892839	0.0916213
	23/24	0	0.0132668	0.0755682	0.12473	0.144166	0.146425	0.150212	0.150474		23/24	0	0.00626809	0.05637	0.124293	0.143146	0.145304	0.149103	0.155222		23/24	0	0.0068986	0.0811688	0.136212	0.145637	0.14851	0.155296	0.153308		23/24	0	0.0266336	0.0891657	0.113686	0.143716	0.145461	0.146236	0.142891
	24/25	0	0.0433293	0.228227	0.36771	0.449165	0.465285	0.484804	0.487996		24/25	0	0.0260762	0.189921	0.390992	0.477356	0.492365	0.509563	0.503867		24/25	0	0.0265993	0.244279	0.3978	0.444836	0.457538	0.479509	0.482185		24/25	0	0.0773123	0.25048	0.314337	0.425302	0.445953	0.465341	0.477937
	25/26	0	0.0134232	0.071685	0.123765	0.15425	0.158198	0.163175	0.166317		25/26	0	0.00641244	0.049054	0.117505	0.153507	0.152376	0.157082	0.16375		25/26	0	0.00762757	0.0777391	0.138031	0.155066	0.162656	0.161979	0.166806		25/26	0	0.0262294	0.0882618	0.115758	0.154176	0.159561	0.170465	0.168395
	26/27	0	0.00677609	0.0358339	0.0649906	0.0816926	0.0839222	0.0859026	0.088251		26/27	0	0.00332782	0.0212254	0.0573982	0.0727659	0.0755733	0.0761725	0.0790718		26/27	0	0.00372409	0.0404452	0.0751474	0.0855962	0.0863965	0.0899947	0.0905612		26/27	0	0.0132764	0.0458311	0.0624262	0.0867157	0.0897969	0.0915406	0.0951199
	27/28	0	0.00086225	0.00248767	0.00371031	0.00473768	0.00485561	0.00532931	0.00648536		27/28	0	0.000273971	0.00129179	0.00204767	0.0027864	0.00291142	0.00343316	0.00407727		27/28	0	0.000165646	0.00187015	0.00389446	0.00439659	0.00463273	0.00485315	0.00680205		27/28	0	0.00214713	0.00430108	0.0051888	0.00703004	0.00702267	0.00770162	0.00857677
Radiolabel TS 3'	AVERAGES	Time (s)									REP1	Time (s)									REP2	Time (s)									REP3	Time (s)
	Dinucleotide	0	5	10	20	40	80	600	3600		Dinucleotide	0	5	10	20	40	80	600	3600		Dinucleotide	0	5	10	20	40	80	600	3600		Dinucleotide	0	5	10	20	40	80	600	3600
	25/26	0	0.00361585	0.0218567	0.0174345	0.00600074	0.00312813	0.00172633	0.000991734		25/26	0	0.000889862	0.0116493	0.0200377	0.00464259	0.00500003	0.00120256	0.000891305		25/26	0	0.00110859	0.0250339	0.0111915	0.00722186	0.00166664	0.00107732	0.00057173		25/26	0	0.00884911	0.0288869	0.0210742	0.00613778	0.00271771	0.00289911	0.00151217
	24/25	0	0.0168612	0.143255	0.203444	0.0785674	0.0321451	0.0197822	0.0125644		24/25	0	0.00745886	0.0967226	0.202398	0.0775947	0.0362676	0.0150503	0.00872605		24/25	0	0.00594275	0.17948	0.217238	0.0780403	0.0225355	0.0149917	0.0112361		24/25	0	0.037182	0.153563	0.190695	0.0800673	0.037632	0.0293045	0.0177311
	23/24	0	0.00853917	0.105192	0.239085	0.337788	0.342828	0.316474	0.233864		23/24	0	0.00383674	0.0692077	0.234489	0.333576	0.329591	0.318011	0.230658		23/24	0	0.00167899	0.131908	0.28781	0.345947	0.369379	0.345527	0.249687		23/24	0	0.0201018	0.114461	0.194958	0.33384	0.329515	0.285884	0.221247
	22/23	0	0.00411288	0.0627806	0.231462	0.506098	0.567014	0.603894	0.647657		22/23	0	0.00205664	0.0384178	0.222773	0.517461	0.563882	0.600901	0.635485		22/23	0	0.000819931	0.0790946	0.293334	0.502696	0.563197	0.591804	0.651364		22/23	0	0.00946206	0.0708293	0.178278	0.498137	0.573963	0.618976	0.656123
	21/22	0	0.000195701	0.000847706	0.0047215	0.00802554	0.0082741	0.0325313	0.0861472		21/22	0	1.62943e-05	0.000240102	0.00278649	0.0123918	0.0079683	0.0236505	0.0897868		21/22	0	3.6307e-05	0.000554773	0.00225209	0.00494779	0.00652071	0.0330232	0.0801124		21/22	0	0.000534503	0.00174824	0.00912592	0.00673708	0.0103333	0.0409203	0.0885425
Appendix 2—figure 1B
Radiolabel NTS 5'	AVERAGES	Time (s)									REP1	Time (s)									REP2	Time (s)									REP3	Time (s)
	Dinucleotide	0	5	10	20	40	80	600	3600		Dinucleotide	0	5	10	20	40	80	600	3600		Dinucleotide	0	5	10	20	40	80	600	3600		Dinucleotide	0	5	10	20	40	80	600	3600
	19/20	0	0.000791967	0.000456274	0.000194711	6.54556e-05	7.97492e-05	7.58711e-05	0.000112864		19/20	0	0.000931424	0.000513134	0.000244777	9.56675e-05	0.000124325	6.57929e-05	7.18955e-05		19/20	0	0.000806212	0.000448453	0.000126637	4.88186e-05	7.30033e-05	4.82641e-05	8.1431e-05		19/20	0	0.000638265	0.000407233	0.00021272	5.18806e-05	4.19189e-05	0.000113556	0.000185266
	18/19	0	0.00450892	0.000731985	0.000144705	6.73806e-05	6.80674e-05	5.06537e-05	5.40495e-05		18/19	0	0.0045117	0.000900243	0.000157744	0.00010887	6.62765e-05	6.12061e-05	8.20933e-05		18/19	0	0.00558793	0.000631255	0.000148887	4.92335e-05	8.51427e-05	4.10613e-05	3.55419e-05		18/19	0	0.00342713	0.000664458	0.000127485	4.40379e-05	5.27829e-05	4.96936e-05	4.45133e-05
	17/18	0	0.00169507	4.08591e-05	5.98071e-05	6.90221e-05	5.96675e-05	5.41929e-05	6.27392e-05		17/18	0	0.0012977	3.34998e-05	6.29196e-05	7.347e-05	7.20037e-05	6.60175e-05	6.38837e-05		17/18	0	0.00214887	4.10937e-05	9.38779e-05	0.000104402	4.91963e-05	5.59781e-05	8.53672e-05		17/18	0	0.00163864	4.79839e-05	2.26237e-05	2.91945e-05	5.78024e-05	4.05832e-05	3.89666e-05
	16/17	0	0.0449643	0.00519353	0.000850224	0.000357505	0.000271594	0.000135493	9.32409e-05		16/17	0	0.0450299	0.0068899	0.000927052	0.000391129	0.000327883	0.000213485	8.93446e-05		16/17	0	0.0573693	0.00420952	0.000798444	0.000294563	0.000287536	0.000103515	0.00010649		16/17	0	0.0324937	0.00448118	0.000825176	0.000386823	0.000199363	8.94782e-05	8.38884e-05
	15/16	0	0.13945	0.0380662	0.0100411	0.00277043	0.000520029	0.000218096	0.000155202		15/16	0	0.139568	0.0394728	0.00995882	0.0022708	0.000371941	0.000259146	5.55651e-05		15/16	0	0.162204	0.0347751	0.00695662	0.00223768	0.000363959	0.000209877	0.000108657		15/16	0	0.116579	0.0399507	0.0132079	0.00380282	0.000824187	0.000185264	0.000301385
	14/15	0	0.203698	0.205484	0.174213	0.0932424	0.0370667	0.0211328	0.0114477		14/15	0	0.186238	0.195491	0.173466	0.0818961	0.0329373	0.0108089	0.00605519		14/15	0	0.207016	0.214422	0.166751	0.102306	0.0332753	0.0205036	0.0106156		14/15	0	0.217838	0.20654	0.182421	0.095525	0.0449876	0.032086	0.0176723
	13/14	0	0.400073	0.591485	0.642504	0.654976	0.649195	0.615491	0.481046		13/14	0	0.36273	0.566468	0.655076	0.677304	0.665447	0.633733	0.490574		13/14	0	0.368214	0.609884	0.638498	0.637737	0.640666	0.607329	0.477931		13/14	0	0.469275	0.598102	0.633937	0.649887	0.641473	0.605412	0.474634
	12/13	0	0.0302457	0.0707522	0.12279	0.206157	0.26692	0.293766	0.306561		12/13	0	0.0223442	0.0529904	0.113614	0.200933	0.259518	0.291705	0.298213		12/13	0	0.0267521	0.0726204	0.140442	0.210631	0.275132	0.300507	0.311807		12/13	0	0.0416407	0.0866457	0.114314	0.206907	0.266108	0.289086	0.309661
	11/12	0	0.00156898	0.00184242	0.00583266	0.0119823	0.0216993	0.0537048	0.182287		11/12	0	0.000728172	0.00174816	0.00345351	0.00641995	0.015175	0.0422245	0.180515		11/12	0	0.000916869	0.0016122	0.00692701	0.0156011	0.0261186	0.0592413	0.184675		11/12	0	0.0030619	0.00216691	0.00711745	0.0139258	0.0238042	0.0596486	0.181671
	10/11	0	0.0010446	0.00164918	0.00181832	0.00185099	0.00192626	0.00303245	0.00907513		10/11	0	0.00084257	0.00140793	0.00183426	0.00178765	0.0018551	0.00235823	0.00858617		10/11	0	0.0009645	0.00171134	0.00185974	0.00196232	0.00201279	0.00238954	0.00881456		10/11	0	0.00132673	0.00182828	0.00176096	0.001803	0.00191089	0.00434958	0.00982466
	9/10	0	0.000113867	0.000234599	0.000336414	0.000594079	0.000790171	0.000910567	0.000925813		9/10	0	0.000176122	0.000276008	0.000360814	0.000622448	0.000769739	0.000947709	0.00102847		9/10	0	6.14268e-05	0.00023595	0.000369351	0.000582713	0.000805743	0.00101498	0.000926019		9/10	0	0.000104053	0.00019184	0.000279077	0.000577075	0.00079503	0.000769009	0.000822953
	8/9	0	8.87136e-05	0.000102042	9.56709e-05	0.000139468	0.000142494	0.000215123	0.000494816		8/9	0	9.32381e-05	0.000138201	0.000150252	0.000229023	0.000151114	0.000174929	0.000447745		8/9	0	7.51859e-05	8.65776e-05	6.20519e-05	8.7189e-05	0.000136847	0.000220029	0.00053851		8/9	0	9.77167e-05	8.13475e-05	7.47085e-05	0.000102192	0.000139519	0.000250412	0.000498193
Radiolabel NTS 3'	AVERAGES	Time (s)									REP1	Time (s)									REP2	Time (s)									REP3	Time (s)
	Dinucleotide	0	5	10	20	40	80	600	3600		Dinucleotide	0	5	10	20	40	80	600	3600		Dinucleotide	0	5	10	20	40	80	600	3600		Dinucleotide	0	5	10	20	40	80	600	3600
	14/15	0	0.0103056	0.00248152	0.000199255	6.57149e-05	0.000126987	0.00011327	0.000136982		14/15	0	0.00255721	0.000782603	0.000262254	8.67149e-05	0.000290434	0.000373731	0.000445041		14/15	0	0.0160186	0.00388357	7.62864e-05	9.79122e-05	-3.28623e-05	-3.82675e-05	-5.66072e-05		14/15	0	0.0123411	0.00277839	0.000259224	1.25176e-05	0.000123389	4.34638e-06	2.25109e-05
	15/16	0	0.0347929	0.0112692	0.00362462	0.00260452	0.0023086	0.0024292	0.0014348		15/16	0	0.0255056	0.00410334	0.00139307	0.000752813	0.00106492	0.00112753	0.00105058		15/16	0	0.0408279	0.0150969	0.00481849	0.0040644	0.00306278	0.00269204	0.000652601		15/16	0	0.0380453	0.0146075	0.0046623	0.00299633	0.00279811	0.00346803	0.00260123
	16/17	0	0.0414109	0.0196868	0.0126967	0.0101281	0.00970544	0.0103904	0.00778273		16/17	0	0.0285048	0.00653583	0.00295471	0.00318669	0.00321445	0.00409475	0.00316538		16/17	0	0.0428547	0.0233486	0.0132374	0.0101125	0.00969723	0.0116248	0.0097058		16/17	0	0.0528731	0.029176	0.0218981	0.0170851	0.0162046	0.0154517	0.010477
	17/18	0	0.0718561	0.0885666	0.0862793	0.0700524	0.0546678	0.055713	0.0582896		17/18	0	0.0358396	0.0209738	0.0353807	0.0345737	0.0334222	0.0301982	0.0305787		17/18	0	0.0855783	0.176278	0.137761	0.103572	0.0716854	0.0669619	0.0652401		17/18	0	0.0941505	0.0684476	0.0856967	0.0720113	0.0588957	0.069979	0.07905
	18/19	0	0.292585	0.488893	0.607024	0.621306	0.625285	0.620657	0.630539		18/19	0	0.256662	0.400908	0.647961	0.635145	0.627191	0.618633	0.622484		18/19	0	0.20703	0.480369	0.556698	0.594446	0.619876	0.624281	0.636428		18/19	0	0.414064	0.585401	0.616412	0.634328	0.628786	0.619056	0.632703
	19/20	0	0.0935385	0.188034	0.23797	0.246271	0.254201	0.255249	0.247227		19/20	0	0.0666177	0.145168	0.250155	0.259299	0.249475	0.25083	0.247881		19/20	0	0.063158	0.216261	0.241821	0.246201	0.258633	0.2619	0.256135		19/20	0	0.15084	0.202671	0.221935	0.233314	0.254497	0.253015	0.237664
	20/21	0	0.00177643	0.00862521	0.0197858	0.0231503	0.024089	0.0263955	0.0248777		20/21	0	0.000672574	0.00540457	0.0185431	0.0231396	0.021878	0.0219933	0.0205267		20/21	0	0.000700291	0.00910968	0.0233028	0.0244573	0.0247896	0.0257634	0.0251732		20/21	0	0.00395643	0.0113614	0.0175114	0.0218539	0.0255995	0.0314297	0.0289333
	21/22	0	0.000100336	0.000319375	0.000292656	0.000447684	0.000408557	0.00038827	0.000413679		21/22	0	0.000134788	0.000212939	6.69435e-05	0.000276329	0.000515108	0.000462874	0.000422711		21/22	0	0.000155138	0.000255652	0.000239825	0.000200348	0.000232882	0.000324942	0.000399271		21/22	0	1.10813e-05	0.000489532	0.0005712	0.000866377	0.000477681	0.000376993	0.000419055
	22/23	0	0.000191567	0.000268283	0.00022763	0.000238009	0.000285079	0.000271476	0.000833423		22/23	0	0.000337596	0.000352032	0.000247856	0.000195727	0.000393574	0.000429371	0.00118871		22/23	0	-0.000196239	-0.000128547	-0.000158888	-0.000107478	-0.00012966	-0.00021717	0.000212325		22/23	0	0.000433344	0.000581362	0.000593922	0.000625778	0.000591322	0.000602228	0.00109923

## Sheet: Appendix 2—figure 1—FS2
Appendix 2—figure 1—figure supplement 2
binary complex (protein + crRNA)										ternary complex (protein + crRNA + activator)										steady-state kinetic analysis
REP1										REP1										REP1
Time (seconds)	156.25 nM	312.5 nM	625 nM	1.25 µM	2.5 µM	5 µM	10 µM	15 µM		Time (seconds)	156.25 nM	312.5 nM	625 nM	1.25 µM	2.5 µM	5 µM	10 µM	15 µM		[substrate] (µM)	nM substrate cleaved / s		Vmax (nM/s)	Km
0	58	134	296	612	1196	2447	4364	5697		0	139	293	649	1230	2382	4110	6149	7185		0.15625	0.2654		5.642	2.783
30	61	141	311	635	1245	2527	4476	5785		30	219	449	973	1777	3331	5294	7209	8238		0.3125	0.460422
60	62	142	315	637	1258	2547	4505	5784		60	290	589	1268	2267	4216	6396	8194	9196		0.625	0.991276
90	62	144	320	650	1266	2549	4513	5770		90	357	720	1546	2753	5018	7455	9162	10081		1.25	1.71656
120	62	145	320	646	1270	2572	4557	5782		120	417	842	1812	3204	5812	8484	10133	11078		2.5	2.7704
150	63	145	322	650	1273	2562	4570	5819		150	473	960	2075	3645	6620	9531	11142	12058		5	3.74982
180	63	146	323	651	1273	2580	4569	5794		180	526	1069	2314	4060	7398	10584	12118	13011		10	4.13162
																				15	4.90627
REP2										REP2										REP2
Time (seconds)	156.25 nM	312.5 nM	625 nM	1.25 µM	2.5 µM	5 µM	10 µM	15 µM		Time (seconds)	156.25 nM	312.5 nM	625 nM	1.25 µM	2.5 µM	5 µM	10 µM	15 µM		[substrate] (µM)	nM substrate cleaved / s		Vmax (nM/s)	Km
0	67	149	308	602	1187	2257	3927	5192		0	150	340	733	1287	2656	4348	5932	7237		0.15625	0.281994		7.49	2.909
30	70	156	323	624	1232	2358	4091	5323		30	232	531	1132	1959	3835	5947	7438	8606		0.3125	0.577504
60	72	157	327	631	1237	2391	4140	5425		60	306	704	1501	2572	4928	7414	8848	9779		0.625	1.23588
90	72	158	328	636	1245	2404	4188	5451		90	373	866	1840	3158	5981	8802	10137	11000		1.25	2.12513
120	72	159	329	639	1251	2415	4193	5477		120	439	1023	2186	3719	7011	10209	11543	12180		2.5	3.51386
150	73	160	331	646	1258	2429	4223	5497		150	502	1174	2493	4281	7988	11615	12869	13480		5	5.02972
180	73	160	332	648	1263	2437	4255	5499		180	563	1306	2800	4787	8983	13062	14334	14753		10	5.76277
																				15	6.14581
REP3										REP3										REP3
Time (seconds)	156.25 nM	312.5 nM	625 nM	1.25 µM	2.5 µM	5 µM	10 µM	15 µM		Time (seconds)	156.25 nM	312.5 nM	625 nM	1.25 µM	2.5 µM	5 µM	10 µM	15 µM		[substrate] (µM)	nM substrate cleaved / s		Vmax (nM/s)	Km
0	78	150	307	588	1108	2172	3891	5148		0	163	303	588	1211	2205	3494	5229	6387		0.15625	0.382307		6.053	2.346
30	82	158	321	620	1166	2264	4046	5247		30	269	499	949	1869	3263	4751	6426	7505		0.3125	0.628519
60	85	163	330	631	1180	2312	4110	5317		60	368	687	1288	2489	4251	5921	7571	8535		0.625	1.15946
90	85	165	334	640	1192	2336	4145	5321		90	462	865	1606	3091	5204	7050	8681	9574		1.25	2.19218
120	86	168	337	645	1205	2346	4161	5373		120	553	1036	1929	3698	6153	8250	9846	10648		2.5	3.23247
150	86	170	340	647	1207	2361	4178	5359		150	639	1206	2243	4264	7104	9368	10972	11736		5	4.05942
180	87	170	342	649	1209	2373	4189	5401		180	720	1363	2538	4832	8062	10561	12197	12864		10	4.77813
																				15	5.33491
Relationship between total fluorescent reporter concentration and rate of fluorescence increase upon reporter cleavage
Let F be the fluorescence emitted by the sample. F is a function of both T (total concentration of reporter) and C (cleaved concentration of reporter). These data establish dF/dC for a given value of T. These experiments were conducted by combining dJCC_300 and dJCC_783/784 at various concentrations (in the presence of dAsCas12a + crRNA + activator) and making a fluorescence measurement at equili…
[cleaved substrate] (nM)	156.25 nM total		[cleaved substrate] (nM)	312.5 nM total		[cleaved substrate] (nM)	625 nM total		[cleaved substrate] (nM)	1250 nM total		[cleaved substrate] (nM)	2500 nM total		[cleaved substrate] (nM)	5000 nM total		[cleaved substrate] (nM)	10000 nM total		[cleaved substrate] (nM)	15000 nM total
0	46		0	103		0	216		0	487		0	1092		0	2269		0	4009		0	5253
12	106		22	251		40	536		72	1108		130	2296		196	3692		270	5779		340	7195
24	171		44	427		80	777		144	1774		260	3619		392	5693		540	8124		680	9691
36	329		66	639		120	1237		216	2331		390	4732		588	7429		810	10199		1020	12033
48	391		88	904		160	1651		288	3111		520	6413		784	9185		1080	12305		1360	13959
60	513		110	1085		200	2022		360	3720		650	7364		980	11473		1350	14306		1700	16113
78.125	673		156.25	1466		312.5	3070		625	6369		1250	12967		2500	22844		5000	35750		7500	43413
156.25	1300		312.5	2527		625	5885		1250	11846		2500	22728		5000	37636		10000	53296		15000	60347
Transformation function:
Total [probe] (nM)	Slope in region of interest (RFU/nM)	<- (dF/dC)
156.25	7.971
312.5	9.196
625	9.168
1250	9.02
2500	9.851
5000	9.364
10000	7.739
15000	6.465

## Sheet: Appendix 2—figure 1—FS3
Appendix 2—figure 1—figure supplement 3
Time (s)	.625 nM	1.25 nM	2.5 nM	5 nM	10 nM	50 nM	100 nM	200 nM
0	0	0	0	0	0	0	0	0
5	0.00189914	0.00359489	0.0129869	0.0603962	0.312834	0.499558	0.582177	0.491735
10	0.00329802	0.0098981	0.0532045	0.145186	0.433011	0.546313	0.482392	0.534149
20	0.00828045	0.0286549	0.0893131	0.291633	0.86944	0.924844	0.918196	0.912585
40	0.031404	0.101386	0.27775	0.685887	0.930911	0.934348	0.928202	0.911702
600	0.0916628	0.300174	0.716069	0.910346	0.941002	0.897596	0.883571	0.888932
kobs (/s)	0.00835	0.00825	0.01022	0.02472	0.07795	0.1228	0.1304	0.1224

## Sheet: Appendix 2—figure 1—FS4
Appendix 2—figure 1—figure supplement 4
	Activator Titration			Protein Titration
	[activator] (nM)	fraction cleaved		[AsCas12a] (nM)	fraction cleaved
	0	0.0280408		0	0.00211588
	1.25	0.0780148		1.25	0.00206895
	2.5	0.163848		2.5	0.00298777
	5	0.284619		5	0.00328981
	10	0.505166		10	0.00285927
	20	0.764153		20	0.00111682
	40	0.88156		40	0.00577611
	80	0.966053		80	0.0295304
	160	0.972848		160	0.0648099
	320	0.958209		320	0.0615381

## Sheet: Appendix 2—figure 1—FS5
Appendix 2—figure 1—figure supplement 5
See Source Data for "Appendix 2—figure 1"

## Sheet: Appendix 2—figure 1—FS6
Appendix 2—figure 1—figure supplement 6
Radiolabel NTS 5'	FRACTION	Time (s)
	Dinucleotide	0	5	10	20	40	80	600	3600
	18/19	0	0.264141	0.0942032	0.0183174	0.00212698	0.0010724	0.000637117	8.14933e-05
	17/18	0	0.152019	0.0621592	0.015726	0.00172172	0.00104663	0.000591245	0.000213276
	16/17	0	0.0264796	0.0263387	0.0354845	0.0238224	0.0154159	0.00305283	7.22738e-05
	15/16	0	0.249646	0.494401	0.558088	0.50948	0.415329	0.0370286	0.00913357
	14/15	0	0.0799361	0.200105	0.241	0.270539	0.258973	0.256123	0.205125
	13/14	0	0.0132001	0.0338431	0.0617636	0.134765	0.247446	0.608769	0.638612
	12/13	0	0.000671952	0.00189566	0.0032274	0.0119829	0.0265861	0.0775397	0.130187
	11/12	0	0.000232937	0.000588867	0.000738606	0.00101571	0.00105975	0.00178496	0.00390518
	10/11	0	0.000174563	0.000171404	0.000279493	0.000525746	0.000892131	0.00207384	0.00221219
	9/10	0	6.23272e-05	7.07277e-05	7.36385e-05	0.000117596	0.000174704	0.000485013	0.000500603
Radiolabel NTS 3'	FRACTION	Time (s)
	Dinucleotide	0	5	10	20	40	80	600	3600
	15/16	0	0.00496123	0.00758567	0.0112316	0.0092161	0.00951178	0.00848801	0.00905073
	16/17	0	0.0347205	0.0351428	0.0384597	0.0372194	0.0379865	0.0242379	0.0230373
	17/18	0	0.180474	0.313177	0.372012	0.355315	0.411284	0.345705	0.349009
	18/19	0	0.293598	0.45718	0.484676	0.550749	0.502307	0.581977	0.580841
	19/20	0	0.0135364	0.0207755	0.0235034	0.0256063	0.0221696	0.0302143	0.0258228
Radiolabel TS 5'	FRACTION	Time (s)
	Dinucleotide	0	5	10	20	40	80	600	3600
	22/23	0	0.524588	0.595145	0.605735	0.622728	0.632325	0.645639	0.631314
	23/24	0	0.0479215	0.0565832	0.0597062	0.0632716	0.0655848	0.0648964	0.0597373
	24/25	0	0.0133978	0.0175543	0.0197019	0.0214587	0.0223083	0.0259363	0.0291705
	25/26	0	0.0514247	0.0636108	0.0690803	0.0714761	0.0728079	0.0742083	0.0685983
	26/27	0	0.101151	0.126478	0.133879	0.14021	0.14175	0.147616	0.154781
	27/28	0	0.00300714	0.00351599	0.00422037	0.00371243	0.00379893	0.00407214	0.00453892
	28/29	0	0.00191631	0.00237293	0.0024509	0.00272293	0.00308858	0.00389988	0.0132031
	29/30	0	0.000833122	0.000905405	0.000888795	0.000893823	0.000862707	0.000936129	0.00124036
	30/31	0	0.00108908	0.000854326	0.00075336	0.000858861	0.000944522	0.0014182	0.00582634
	31/32	0	0.000820118	0.00113661	0.00113546	0.00109524	0.00111881	0.00141055	0.00408321
Radiolabel TS 3'	FRACTION	Time (s)
	Dinucleotide	0	5	10	20	40	80	600	3600
	26/27	0	0.0402428	0.0723342	0.0711623	0.0503266	0.0235905	0.00250122	0.000444837
	25/26	0	0.0278437	0.0549588	0.0584639	0.0477148	0.0340262	0.00299905	0.00119279
	24/25	0	0.0141863	0.0244124	0.0258625	0.0341963	0.0283756	0.0206261	0.0122899
	23/24	0	0.0611843	0.0996916	0.109192	0.138454	0.154593	0.192348	0.166943
	22/23	0	0.336138	0.577365	0.637102	0.681593	0.721014	0.757418	0.80002
