# Supplementary material for: CRISPR-Cas12a exploits R-loop asymmetry to form double-strand breaks
Source: eLife. 2020 Jun 10;9:e55143. doi: 10.7554/eLife.55143 (PMC7286691; doi:10.7554/eLife.55143)
Supplement: Appendix 2—figure 2—source data 1. [file elife-55143-app2-fig2-data1.xlsx]

## Sheet: Appendix 2—figure 2A
Appendix 2—figure 2A
	no NTS	intact NTS, fully PO	intact NTS, PS tract	nick	1-nt	2-nt	3-nt	4-nt	5-nt	6-nt	7-nt	PAM-proximal frag. only
rep1	0.251624	0.367287	0	0.0193617	0.0446189	0.0616276	0.144555	0.256089	0.437632	0.647593	0.714415	0.849933
rep2	0.381862	0.296886	0.00461104	0.0223522	0.0375986	0.062826	0.135577	0.216901	0.366619	0.606299	0.658696	0.941682
rep3	0.384543	0.291346	0.00405141	0.0209404	0.038994	0.0622728	0.147019	0.234318	0.384049	0.604975	0.680442	0.957641

## Sheet: Appendix 2—figure 2B
Appendix 2—figure 2B
	NTS cleavage			TS cleavage			TS cleavage, pre-gapped NTS
	rep1	rep2	rep3	rep1	rep2	rep3	rep1	rep2	rep3
WT AsCas12a	535.32	992.88	981	169.848	254.016	232.236	253.296	391.32	346.212
AsCas12a R1226A	1.13796	1.12896	1.1178	0.006188	0.0058608	0.005454	0.2556	0.25614	0.197676
Cas12i1	6.1632	6.4836	6.2748	0.16848	0.12042	0.089316	0.23256	0.17946	0.14382

## Sheet: Appendix 2—figure 2—FS2
Appendix 2—figure 2—figure supplement 2
Magnesium
Time (seconds)	blue	red	green	magenta
0	0	0	0	0
5	0.539606	0.00010574	0.0397019	0.00185198
15	0.722922	0.00023621	0.390851	0.0149473
60	0.900888	0.0179513	0.894352	0.158518
300	0.909682	0.134369	0.938962	0.496652
600	0.895455	0.242357	0.947234	0.65367
1800	0.910982	0.487707	0.956137	0.815603
3600	0.913366	0.596939	0.963108	0.880783
Calcium
Time (seconds)	blue	red	green	magenta
0	0	0	0	0
5	0.00144252	0.00045734	0.000652	0.0014351
15	0.00441692	0.00022181	0.00042778	0.0004185
60	0.101085	0.00116561	0.00081622	0.00082335
300	0.499299	0.00091437	0.0114205	0.00377425
600	0.721349	0.00175671	0.025604	0.00681714
1800	0.869182	0.00259892	0.157753	0.022851
3600	0.883759	0.00337987	0.428582	0.0428693

## Sheet: Appendix 2—figure 2—FS3
Appendix 2—figure 2—figure supplement 3
	PO/Mg2+				PS/Mg2+				PO/Ca2+				PS/Ca2+
[dAsCas12a] (nM)	rep1	rep2	rep3		rep1	rep2	rep3		rep1	rep2	rep3		rep1	rep2	rep3
0	0	0	0		0	0	0		0	0	0		0	0	0
0.6	0.0603229	0.0536292	0.0510963		0.732066	0.759337	0.765634		0.441609	0.420154	0.438819		0.973251	0.983308	0.977778
1.2	0.120705	0.0995995	0.0952479		0.935801	0.946952	0.953652		0.67457	0.625862	0.640324		0.982071	0.986557	0.982607
2.3	0.216061	0.208161	0.181618		0.976398	0.982241	0.984903		0.769603	0.761203	0.760577		0.985835	0.987926	0.982764
4.7	0.322656	0.313056	0.302323		0.981681	0.98593	0.988118		0.812678	0.809711	0.812319		0.985453	0.987053	0.989401
9.4	0.434143	0.455177	0.421018		0.98261	0.987513	0.989508		0.819665	0.840101	0.847971		0.990006	0.988396	0.985697
18.8	0.596821	0.587234	0.565084		0.985633	0.990899	0.991973		0.878351	0.866841	0.872208		0.991251	0.991817	0.994064
37.5	0.671155	0.711869	0.682412		0.987774	0.993336	0.993852		0.89041	0.883585	0.896198		0.988579	0.989445	0.992807
75	0.758456	0.746385	0.753501		0.991392	0.992605	0.99341		0.910494	0.912146	0.900307		0.991114	0.994439	0.994617
150	0.813073	0.812478	0.817793		0.992532	0.993547	0.993663		0.922075	0.925224	0.916607		0.994059	0.995238	0.991191
300	0.850458	0.862567	0.870817		0.994845	0.995095	0.995672		0.932406	0.925786	0.923703		0.995694	0.993576	0.993538
600	0.884062	0.894372	0.902167		0.996828	0.996418	0.996783		0.939347	0.939359	0.928767		0.996777	0.997541	0.997194

## Sheet: Appendix 2—figure 2—FS5
Appendix 2—figure 2—figure supplement 5
	Position 1	Position 2	Position 3	Position 4
buffer only	0
ss targeting	0.251624
NTS INTACT, UNPROTECTED	0.367287
FULLY PROTECTED	0
NICKS	0.0132026	0.0193617	0.0337071
1-NT GAPS	0.0233637	0.0446189	0.0471358	0.0474681
2-NT GAPS	0.0616276	0.0823102	0.0475232
3-NT GAPS	0.0869851	0.144555	0.0663793	0.0595464
4-NT GAPS	0.256089	0.182678	0.10705
5-NT GAPS	0.437632	0.373476	0.17793
6-NT GAPS	0.647593	0.393736
7-NT GAP	0.714415
PAM-proximal fragment only	0.849933

## Sheet: Appendix 2—figure 2—FS6
Figure 8—figure supplement 6																			Appendix 2—figure 2—figure supplement 6
																				Position 1	Position 2	Position 3	Position 4
																			buffer only	0
																			ss targeting	0.0490849
																			NTS INTACT, UNPROTECTED	0.139978
																			FULLY PROTECTED	0
																			NICKS	0.00901738	0.00845197	0.00981037
																			1-NT GAPS	0.00532594	0.0124084	0.0172663	0.0170065
																			2-NT GAPS	0.0133387	0.0217961	0.0236741
																			3-NT GAPS	0.0139297	0.0608694	0.0226024	0.0156624
																			4-NT GAPS	0.103285	0.067189	0.0219462
																			5-NT GAPS	0.207662	0.177558	0.0797319
																			6-NT GAPS	0.467092	0.244945
																			7-NT GAP	0.531217
																			PAM-proximal fragment only	0.651286

## Sheet: Appendix 2—figure 2—FS7
Appendix 2—figure 2—figure supplement 7
	Position 1	Position 2	Position 3	Position 4
buffer only	0
AsCas12a+crRNA	0.021372
TS(PO)	0.899191
TS(PS)	0.146402
NTS(PO)/TS(PO)	0.964362
NTS(PS)/TS(PO)	0.0193715
NTS(pc)/TS(pc)	0.970561
NTS(PO)/TS(PS)	0.520539
NTS(PS)/TS(PS)	0.00304717
NICKS	0.0123792	0.0012162	0.0021659
1-NT GAPS	0.0939989	0.00269436	0.00316722	0.00219399
2-NT GAPS	0.00704772	0.00335591	0.00321717
3-NT GAPS	0.0304703	0.00345318	0.00330129	0.00065491
4-NT GAPS	0.0303751	0.00760142	0.00135104
5-NT GAPS	0.269565	0.0505038	0.00293166
6-NT GAPS	0.269598	0.0110328
7-NT GAP	0.112825

## Sheet: Appendix 2—figure 2—FS8
Appendix 2—figure 2—figure supplement 8
REP1	time (s)	*NTS, AsCas12a WT	*NTS, AsCas12a R1226A	*NTS, Cas12i1	*TS, AsCas12a WT	*TS, AsCas12a R1226A	*TS, Cas12i1	*TS_pgNTS, AsCas12a WT	*TS_pgNTS, AsCas12a R1226A	*TS_pgNTS, Cas12i1
	0	0	0	0	0	0	0	0	0	0
	5	0.647994	0	0	0.081057	0.0001591	0.0002493	0.313896	0.00639504	2.005e-05
	10	0.606282	0	0	0.175696	0	0.00045479	0.360713	-0.0007128	-0.0004436
	20	0.935561	0	0.00414864	0.768013	0.00022998	0.000607	0.864739	-0.0005961	-0.0002723
	40	0.961983	0	0.0453782	0.936483	0.00031119	0.0008333	0.941212	-0.0005768	0.00036763
	300	0.982145	0.0616997	0.3903	0.972286	0.00010761	0.00176758	0.973062	0.00770328	0.0137162
	600	0.985093	0.146532	0.617854	0.980818	0.00020842	0.00404112	0.979605	0.0258441	0.0282208
	1800	0.988965	0.436199	0.891817	0.986198	0.00099118	0.0430616	0.98605	0.116224	0.0921476
	3600	0.985589	0.696121	0.96212	0.991016	0.00738936	0.181518	0.975406	0.232575	0.219779
REP2	time (s)	*NTS, AsCas12a WT	*NTS, AsCas12a R1226A	*NTS, Cas12i1	*TS, AsCas12a WT	*TS, AsCas12a R1226A	*TS, Cas12i1	*TS_pgNTS, AsCas12a WT	*TS_pgNTS, AsCas12a R1226A	*TS_pgNTS, Cas12i1
	0	0	0	0	0	0	0	0	0	0
	5	0.779064	-6.638e-05	0.00297726	0.19848	-0.0001428	0.00085643	0.45181	0.0012004	0.00107407
	10	0.809825	-0.0006073	0.00360849	0.445601	-2.91577e-05	0.00106203	0.594885	6.3886e-05	0.00109524
	20	0.960627	-0.0003029	0.0180732	0.881975	-4.678e-05	0.00101395	0.901768	-0.0001097	0.00093888
	40	0.973508	0.00272427	0.0555366	0.944665	-9.685e-05	0.00103574	0.94239	-4.219e-05	0.00165652
	300	0.987714	0.0683817	0.403437	0.978001	5.1893e-05	0.00142168	0.975891	0.00779107	0.00998161
	600	0.990528	0.160051	0.625328	0.984856	3.2227e-05	0.00295809	0.982726	0.0219298	0.023355
	1800	0.993311	0.437883	0.880577	0.990983	0.00048279	0.0303952	0.988002	0.107402	0.0767805
	3600	0.981791	0.681346	0.958863	0.993134	0.00726665	0.132271	0.984636	0.238797	0.170906
REP3	time (s)	*NTS, AsCas12a WT	*NTS, AsCas12a R1226A	*NTS, Cas12i1	*TS, AsCas12a WT	*TS, AsCas12a R1226A	*TS, Cas12i1	*TS_pgNTS, AsCas12a WT	*TS_pgNTS, AsCas12a R1226A	*TS_pgNTS, Cas12i1
	0	0	0	0	0	0	0	0	0	0
	5	0.765331	-0.0006085	0.00107707	0.0984907	-0.0002285	0.00038926	0.348901	0.00573132	-0.0001751
	10	0.837354	-0.0003713	0.00104757	0.44304	-0.000208334	0.00056111	0.589661	-0.0008214	-0.0007401
	20	0.957234	-8.625e-05	0.0113413	0.859824	-9.092e-05	0.00079266	0.890872	-0.0008157	-0.0006741
	40	0.972504	0.00371577	0.0541126	0.943584	-0.0001435	0.00117403	0.941853	-0.0007291	-4.844e-05
	300	0.987087	0.0707423	0.383013	0.977223	-4.327e-05	0.00224227	0.975705	0.00397562	0.00676149
	600	0.989745	0.162209	0.613766	0.984218	-0.0001192	0.00316273	0.98099	0.0138142	0.016976
	1800	0.992664	0.434355	0.868016	0.990099	0.00041618	0.0235129	0.987009	0.0865073	0.0614373
	3600	0.993338	0.675522	0.946704	0.991582	0.00681302	0.0985549	0.970929	0.188503	0.139993

## Sheet: Appendix 2—figure 2—FS9
Appendix 2—figure 2—figure supplement 9
[dAsCas12a] (nM)	AsCas12a D908A, rep1	AsCas12a D908A, rep2	AsCas12a D908A, rep3	AsCas12a R1226A, rep1	AsCas12a R1226A, rep2	AsCas12a R1226A, rep3	AsCas12a WT, rep1	AsCas12a WT, rep2	AsCas12a WT, rep3
0	0	0	0	0	0	0	0	0	0
0.6	0.0441568	0.0387041	0.0317508	0.12381	0.129784	0.145818	0.178841	0.197691	0.197468
1.2	0.0922383	0.0671987	0.0712965	0.233985	0.225011	0.286313	0.32795	0.329344	0.351352
2.3	0.179537	0.118457	0.123845	0.441782	0.454161	0.470825	0.565087	0.540677	0.558258
4.7	0.311079	0.2278	0.231461	0.693767	0.657803	0.727728	0.827499	0.817833	0.821533
9.4	0.463845	0.346056	0.383734	0.881598	0.860534	0.907246	0.952657	0.948752	0.951725
18.8	0.610712	0.497548	0.50403	0.930959	0.944116	0.94473	0.970324	0.973539	0.976549
37.5	0.681363	0.591041	0.58738	0.945271	0.944638	0.964377	0.975849	0.979305	0.97977
75	0.776926	0.705715	0.692334	0.966786	0.968109	0.97235	0.986269	0.986796	0.985398
150	0.796462	0.810358	0.790454	0.976332	0.975879	0.978467	0.990113	0.990248	0.990422
300	0.892268	0.874485	0.879035	0.984986	0.984118	0.983358	0.992259	0.9919	0.992678
600	0.897351	0.898089	0.909633	0.987999	0.985406	0.985851	0.99382	0.994228	0.993839

## Sheet: Appendix 2—figure 2—FS10
Appendix 2—figure 2—figure supplement 10
5' radiolabeled
time (m)	0	0.5	1	2	5	10	30	60
18/19	5.80298e-05	0.000150124	0.000154802	9.88322e-05	0.00161053	0.00133831	0.00551551	0.00587223
17/18	0.000118908	0.00031604	0.000196272	0.000498365	0.000514276	0.000286615	0.0038825	0.00650139
16/17	1.46503e-05	4.86352e-05	0.000898797	0.00198184	0.0145442	0.0169843	0.0556576	0.0629931
15/16	0.000192852	0.0012474	0.0036115	0.00886347	0.0506265	0.056087	0.215736	0.262469
14/15	0.000241597	0.000698633	0.00108241	0.00234125	0.0158122	0.0205025	0.103399	0.189577
13/14	4.79641e-05	0.000110699	0.000126555	0.00044238	0.00255749	0.00309029	0.0520733	0.175236
12/13	0.00014816	0.000249179	0.000154172	0.000110321	0.000185377	0.000127294	0.00112123	0.010295
3' radiolabeled
time (m)	0	0.5	1	2	5	10	30	60
14/15	0.000126312	0.000386039	0.000758899	0.00195737	0.0139941	0.0147485	0.0650932	0.0663761
15/16	0.000746897	0.00240996	0.00453369	0.00988621	0.0498079	0.0509675	0.17106	0.20206
16/17	6.86952e-05	0.000357101	0.000730376	0.00210416	0.0147887	0.0140185	0.0759395	0.126029
17/18	0.000588108	0.000602747	0.000615916	0.001018	0.00232476	0.00270952	0.0380208	0.0982243
18/19	0.000462483	0.000731101	0.000794237	0.00124859	0.00453997	0.00473401	0.0515717	0.16441
19/20	0.000899504	0.000981254	0.00111671	0.00115715	0.00220702	0.00214212	0.0112127	0.0443641

[truncated: 1 more sheets: Appendix 2—figure 2—FS11]
