# Supplementary material for: CRISPR-Cas12a exploits R-loop asymmetry to form double-strand breaks
Source: eLife. 2020 Jun 10;9:e55143. doi: 10.7554/eLife.55143 (PMC7286691; doi:10.7554/eLife.55143)
Supplement: Figure 2—source data 1. [file elife-55143-fig2-data1.xlsx]

## Sheet: Figure 2B
Figure 2B
	T1			T2			T3			T4			T5			T6			T7			T8			T9
	rep1	rep2	rep3	rep1	rep2	rep3	rep1	rep2	rep3	rep1	rep2	rep3	rep1	rep2	rep3	rep1	rep2	rep3	rep1	rep2	rep3	rep1	rep2	rep3	rep1	rep2	rep3
intact NTS	0.0160633	0.0135213	0.0173082	0.0776806	0.0582864	0.0585723	0.0232493	0.0186557	0.0258306	0.0234217	0.016476	0.0185406	0.0173551	0.0139184	0.0188467	0.026347	0.0211793	0.0214055	0.0208518	0.0174847	0.024421	0.0170517	0.0145809	0.0124919	0.00898113	0.00751562	0.00925903
intact NTS + dCas12a	0.238366	0.257018	0.211942	0.218872	0.185975	0.155631	0.0901182	0.0891834	0.103856	0.0649785	0.0516689	0.06013	0.0314901	0.0275221	0.0404463	0.0352891	0.0269337	0.0306549	0.0213628	0.0206621	0.0309548	0.0178077	0.015794	0.013796	0.0129262	0.0101105	0.0138896
cleaved NTS	0.024667	0.0216638	0.0269463	0.0551346	0.0497358	0.0560142	0.0212	0.0195446	0.0296858	0.0174371	0.0140692	0.0190919	0.0146749	0.0142499	0.0228388	0.0178395	0.0155843	0.0188108	0.0172306	0.0169701	0.0277739	0.0104981	0.0112	0.0107838	0.00492262	0.00565097	0.00805148
cleaved NTS + dCas12a	0.423267	0.485638	0.309082	0.370452	0.378163	0.344175	0.20032	0.195652	0.18999	0.0970359	0.0881875	0.103187	0.0595627	0.0527258	0.0618208	0.0348393	0.0289269	0.0380088	0.0326914	0.028482	0.037704	0.0126034	0.0129383	0.0144045	0.0139729	0.0132408	0.0200255

## Sheet: Figure 2—figure supplement 2
Figure 2—figure supplement 2
Top panel
[dAsCas12a] (nM)	EMSA	filter-binding, rep1	filter-binding, rep2	filter-binding, rep3
0	0	0	0	0
0.6	not collected	0.0603229	0.0536292	0.0510963
1.2	0.060978	0.120705	0.0995995	0.0952479
2.3	0.172521	0.216061	0.208161	0.181618
4.7	0.347669	0.322656	0.313056	0.302323
9.4	0.550756	0.434143	0.455177	0.421018
18.8	0.619753	0.596821	0.587234	0.565084
37.5	0.723448	0.671155	0.711869	0.682412
75	0.794709	0.758456	0.746385	0.753501
150	0.916642	0.813073	0.812478	0.817793
300	0.949767	0.850458	0.862567	0.870817
600	0.973978	0.884062	0.894372	0.902167
Bottom panel
[dAsCas12a] (nM)	intact protospacer 1, rep1	intact protospacer 1, rep2	intact protospacer 1, rep3	pre-gapped protospacer 1, rep1	pre-gapped protospacer 1, rep2	pre-gapped protospacer 1, rep3	intact protospacer 2, rep1	intact protospacer 2, rep2	intact protospacer 2, rep3	pre-gapped protospacer 2, rep1	pre-gapped protospacer 2, rep2	pre-gapped protospacer 2, rep3
0	0	0	0	0	0	0	0	0	0	0	0	0
0.6	0.101318	0.0986097	0.138615	0.517258	0.511003	0.573722	0.0162749	0.0135194	0.0229663	0.113531	0.129693	0.14739
1.2	0.154671	0.171897	0.22415	0.71595	0.750578	0.757795	0.0239729	0.0233832	0.033245	0.205534	0.24803	0.273076
2.3	0.231196	0.26464	0.336353	0.907561	0.92126	0.931197	0.0388961	0.0428833	0.0523992	0.354501	0.418767	0.455917
4.7	0.373291	0.419188	0.475743	0.968466	0.970373	0.973593	0.0656642	0.0675055	0.0733683	0.558815	0.63771	0.638466
9.4	0.502305	0.548001	0.603455	0.977342	0.978142	0.981039	0.0815246	0.0955218	0.106294	0.744966	0.793457	0.82215
18.8	0.597597	0.663072	0.707047	0.980069	0.979232	0.985117	0.13276	0.135583	0.166346	0.858252	0.865633	0.890579
37.5	0.671895	0.753384	0.754122	0.986491	0.987013	0.988416	0.192103	0.228013	0.252544	0.860848	0.871002	0.914412
75	0.744766	0.824751	0.842971	0.989657	0.989949	0.989924	0.295157	0.327424	0.367756	0.892792	0.895772	0.917484
150	0.808229	0.862258	0.888687	0.990741	0.990277	0.990902	0.412259	0.442777	0.48916	0.89708	0.900406	0.908377
300	0.870639	0.88505	0.91889	0.992581	0.990648	0.990446	0.521145	0.508418	0.525314	0.906911	0.902856	0.916864
600	0.874784	0.893212	0.924358	0.992743	0.988002	0.985403	0.604992	0.574834	0.641845	0.899881	0.892346	0.921253

## Sheet: Figure 2—figure supplement 3
Figure 2—figure supplement 3
Left panel
Time (s)	Rep1	Rep2	Rep3
0	0.0006805	0.00046281	0.00071324
5	0.0837609	0.0769557	0.085014
10	0.170225	0.167897	0.152369
30	0.411963	0.397984	0.423074
60	0.652233	0.678613	0.65474
120	0.770169	0.799915	0.818515
