# Supplementary material for: CRISPR-Cas12a exploits R-loop asymmetry to form double-strand breaks
Source: eLife. 2020 Jun 10;9:e55143. doi: 10.7554/eLife.55143 (PMC7286691; doi:10.7554/eLife.55143)
Supplement: Figure 3—source data 1. [file elife-55143-fig3-data1.xlsx]

## Sheet: Figure 3A
Figure 3A
	DNA substrate 1	DNA substrate 1 + dCas12a/crRNA	DNA substrate 2	DNA substrate 2 + dCas12a/crRNA
rep1	0.361625	0.858065	0.22657	0.268201
rep2	0.254076	0.877895	0.224822	0.263336
rep3	0.26188	0.83043	0.280273	0.288804

## Sheet: Figure 3—figure supplement 1
Figure 3—figure supplement 1
[dAsCas12a] (nM)	crRNA3/protospacer2, rep1	crRNA3/protospacer2, rep2	crRNA3/protospacer2, rep3	crRNA3/protospacer3, rep1	crRNA3/protospacer3, rep2	crRNA3/protospacer3, rep3	crRNA4/protospacer3, rep1	crRNA4/protospacer3, rep2	crRNA4/protospacer3, rep3	crRNA4/protospacer4, rep1	crRNA4/protospacer4, rep2	crRNA4/protospacer4, rep3	crRNA3/protospacer4, rep1	crRNA3/protospacer4, rep2	crRNA3/protospacer4, rep3
0	0	0	0	0	0	0	0	0	0	0	0	0	0	0	0
0.3	0.00809108	0.00699686	0.00768278	0.584218	0.540912	0.567965	0.601084	0.558791	0.596458	0.465348	0.445761	0.456633	0.437663	0.442904	0.427519
0.6	0.0163588	0.0195903	0.0173883	0.604724	0.61017	0.620903	0.629288	0.597634	0.626969	0.492004	0.479291	0.483973	0.469087	0.4592	0.46974
1.2	0.028265	0.0267317	0.0243976	0.607369	0.599857	0.596385	0.639582	0.592005	0.607915	0.461257	0.428727	0.444622	0.457125	0.432611	0.438238
2.3	0.0392814	0.035995	0.034428	0.555204	0.562798	0.579273	0.560491	0.556912	0.572197	0.396835	0.36674	0.360911	0.388072	0.379218	0.370954
4.7	0.0527119	0.0485488	0.0543613	0.536343	0.529962	0.530763	0.536142	0.514212	0.522481	0.368123	0.336715	0.325004	0.359565	0.339867	0.316631
9.4	0.0685454	0.0584291	0.0711154	0.560416	0.543261	0.53217	0.553651	0.526042	0.534373	0.381921	0.341107	0.339583	0.35897	0.316602	0.336652
18.8	0.0955042	0.091935	0.106377	0.593161	0.550527	0.54782	0.586243	0.544261	0.521991	0.418703	0.355348	0.343627	0.400094	0.332428	0.325241
37.5	0.156165	0.150193	0.188174	0.585994	0.564154	0.539147	0.576399	0.532866	0.551665	0.390461	0.320803	0.376891	0.431211	0.371066	0.27295
75	0.207897	0.226312	0.250434	0.614658	0.624602	0.517761	0.568954	0.61701	0.523763	0.442471	0.36999	0.355684	0.431142	0.426464	0.334949
150	0.301128	0.290561	0.330146	0.667549	0.653054	0.5697	0.641946	0.633755	0.575938	0.481042	0.400407	0.397557	0.483452	0.458805	0.427793
300	0.387321	0.376542	0.405713	0.708887	0.713183	0.636375	0.698989	0.696727	0.658029	0.568458	0.476173	0.481691	0.554382	0.538658	0.51254

## Sheet: Figure 3—figure supplement 2
Figure 3—figure supplement 2
permanganate reactivity index
	T1			T2			T3			T4			T5			T6			T7			T8			T9
	Rep1	Rep2	Rep3	Rep1	Rep2	Rep3	Rep1	Rep2	Rep3	Rep1	Rep2	Rep3	Rep1	Rep2	Rep3	Rep1	Rep2	Rep3	Rep1	Rep2	Rep3	Rep1	Rep2	Rep3	Rep1	Rep2	Rep3
condition 1	0.0297526	0.0249427	0.0233125	0.0717605	0.0535928	0.0490008	0.035358	0.0221339	0.0257994	0.0252448	0.0150338	0.014493	0.028194	0.0160547	0.020192	0.0275774	0.0171514	0.0156505	0.0380316	0.0183124	0.0253656	0.0167743	0.0122728	0.0104929	0.012415	0.0067101	0.00857856
condition 2	0.304121	0.559905	0.354612	0.334497	0.358446	0.317359	0.238737	0.203233	0.198702	0.130168	0.08066	0.0932816	0.0876058	0.0495626	0.0601057	0.0499511	0.0273629	0.0332913	0.0520225	0.0307306	0.0392606	0.0187594	0.0132565	0.0130897	0.0243425	0.0126416	0.0175013
condition 3	0.0512675	0.0406016	0.0365227	0.0931036	0.0711524	0.0679038	0.0538381	0.0327034	0.0367494	0.0378913	0.0225582	0.0253487	0.0315271	0.0179312	0.0207863	0.0292306	0.0177143	0.0188933	0.0295906	0.0154798	0.0194629	0.0164842	0.0101541	0.00958261	0.0127647	0.00640894	0.00808075
condition 4	0.0266069	0.0274816	0.0297639	0.0216934	0.0208805	0.0255318	0.0180196	0.0190173	0.0253396	0.016385	0.0157517	0.0199699	0.01871	0.0189998	0.0275781	0.0163782	0.0164194	0.0198673	0.0270405	0.0233057	0.0371954	0.0110271	0.0115038	0.0116469	0.00734132	0.00840855	0.0120226
condition 5	0.252266	0.27621	0.223474	0.245544	0.182088	0.182938	0.119454	0.113035	0.120786	0.0783919	0.0554979	0.066467	0.0434451	0.0357392	0.0450334	0.0364481	0.024144	0.0299894	0.0302193	0.0280359	0.036884	0.0147056	0.0120324	0.01378	0.0167948	0.0124507	0.0183844
condition 6	0.0349758	0.0363034	0.0336885	0.0382093	0.0366237	0.0366415	0.0262719	0.0267087	0.0306904	0.0246456	0.0234016	0.0261116	0.0192307	0.0184752	0.0229934	0.0188867	0.0173831	0.0212254	0.0176562	0.016797	0.0239751	0.0109558	0.0109823	0.0106726	0.00751728	0.00746476	0.0104913
fraction oxidized
	condition 1	condition 2	condition 3	condition 4	condition 5	condition 6
rep1	0.361625	0.858065	0.428765	0.22657	0.732347	0.268201
rep2	0.254076	0.877895	0.308907	0.224822	0.687681	0.263336
rep3	0.26188	0.83043	0.318229	0.280273	0.686945	0.288804

## Sheet: Figure 3—figure supplement 5
Figure 3—figure supplement 5
Time (s)	A	B	C	D	E
0	0	0	0	0	0
15	0.818442	0.0538163	0.0564157	0.869026	0.105209
60	0.928927	0.394481	0.415665	0.935796	0.57875
240	0.955517	0.831371	0.847837	0.954822	0.881377
900	0.971112	0.892237	0.923504	0.970411	0.909291
3600	0.969449	0.905066	0.928249	0.959139	0.929423

## Sheet: Figure 3—figure supplement 7
Figure 3—figure supplement 7
REP1
Time (s)	A	B	C	D	E	F
0	0	0	0	0	0	0
15	0.703967	0.799734	0.028723	0.80604	0.295251	0.628835
30	0.83066	0.874272	0.0736327	0.880992	0.494982	0.845377
60	0.877073	0.897411	0.219011	0.900917	0.698424	0.907231
120	0.889267	0.916848	0.433092	0.91482	0.839585	0.92829
240	0.88644	0.92439	0.663694	0.927109	0.893725	0.943871
600	0.874409	0.924763	0.837003	0.932358	0.910588	0.959053
REP2
Time (s)	A	B	C	D	E	F
0	0	0	0	0	0	0
15	0.64058	0.819396	0.0689617	0.822494	0.252851	0.409575
30	0.800856	0.881654	0.135274	0.892389	0.434442	0.80344
60	0.859729	0.905349	0.268786	0.921673	0.651004	0.910728
120	0.878178	0.918549	0.492248	0.942361	0.810819	0.927141
240	0.89823	0.927257	0.716518	0.9554	0.878548	0.939935
600	0.901291	0.922507	0.86986	0.956385	0.910865	0.946088
REP3
Time (s)	A	B	C	D	E	F
0	0	0	0	0	0	0
15	0.667242	0.841987	0.0669226	0.833542	0.25532	0.552518
30	0.820589	0.902154	0.132474	0.904592	0.472956	0.839777
60	0.881717	0.923006	0.275904	0.927237	0.721459	0.917726
120	0.899765	0.94082	0.493852	0.949825	0.87093	0.941602
240	0.916959	0.948918	0.738467	0.96107	0.927419	0.955719
600	0.92192	0.948536	0.891098	0.964849	0.941332	0.968556
