# Supplementary material for: CRISPR-Cas12a exploits R-loop asymmetry to form double-strand breaks
Source: eLife. 2020 Jun 10;9:e55143. doi: 10.7554/eLife.55143 (PMC7286691; doi:10.7554/eLife.55143)
Supplement: Figure 4—source data 1. [file elife-55143-fig4-data1.xlsx]

## Sheet: Figure 4A
Figure 4A
	Cas12a-like topology			Cas9-like topology
	DNA	DNA + protein/RNA	DNA + RNA	DNA	DNA + protein/RNA	DNA + RNA
rep1	0.251016	0.859075	0.978944	0.2671	0.373177	0.342381
rep2	0.233197	0.867511	0.957935	0.234618	0.353896	0.281868
rep3	0.29272	0.828063	0.979934	0.30292	0.392746	0.373111

## Sheet: Figure 4—figure supplement 1
Figure 4—figure supplement 1
permanganate reactivity index
	T1			T2			T3			T4			T5			T6			T7			T8			T9
	Rep1	Rep2	Rep3	Rep1	Rep2	Rep3	Rep1	Rep2	Rep3	Rep1	Rep2	Rep3	Rep1	Rep2	Rep3	Rep1	Rep2	Rep3	Rep1	Rep2	Rep3	Rep1	Rep2	Rep3	Rep1	Rep2	Rep3
A	0.024667	0.0216638	0.0269463	0.0551346	0.0497358	0.0560142	0.0212	0.0195446	0.0296858	0.0174371	0.0140692	0.0190919	0.0146749	0.0142499	0.0228388	0.0178395	0.0155843	0.0188108	0.0172306	0.0169701	0.0277739	0.0104981	0.0112	0.0107838	0.00492262	0.00565097	0.00805148
B	0.423267	0.485638	0.309082	0.370452	0.378163	0.344175	0.20032	0.195652	0.18999	0.0970359	0.0881875	0.103187	0.0595627	0.0527258	0.0618208	0.0348393	0.0289269	0.0380088	0.0326914	0.028482	0.037704	0.0126034	0.0129383	0.0144045	0.0139729	0.0132408	0.0200255
C	0.830151	0.827645	0.823311	0.189831	0.184314	0.219745	0.142052	0.127131	0.166547	0.0548683	0.0519619	0.0717972	0.0477543	0.0380657	0.0703086	0.0287091	0.0343433	0.0369672	0.0405332	0.0362488	0.0715729	0.013815	0.0251788	0.0233446	0.0164286	0.0337278	0.0406095
D	1.07488	1.25423	0.922358	0.514151	0.527788	0.550615	0.299382	0.29625	0.325534	0.117559	0.10968	0.136125	0.075582	0.0685967	0.0905501	0.0364987	0.0313054	0.0432075	0.0405048	0.0335079	0.0536469	0.0116332	0.0118683	0.0164973	0.0148506	0.0126442	0.0257128
E	1.02912	1.00001	1.02469	0.689761	0.492395	0.664753	0.354595	0.27571	0.378807	0.145155	0.0908176	0.146876	0.0904675	0.0646584	0.106314	0.046399	0.0262986	0.0443655	0.0551489	0.0389557	0.0701336	0.0167308	0.0107947	0.0185276	0.0249612	0.0130933	0.028475
F	0.0268206	0.0236087	0.0268745	0.0598708	0.0557383	0.0675525	0.0245618	0.0175916	0.0269064	0.0165862	0.0134918	0.0209432	0.016953	0.0128861	0.0198023	0.016654	0.0153472	0.0210161	0.0193478	0.0145898	0.0239433	0.0107084	0.0107226	0.0122668	0.00589136	0.00587067	0.00991947
G	0.0844913	0.0857106	0.0828743	0.06613	0.0645311	0.066429	0.0418628	0.0376549	0.0439815	0.0239883	0.020224	0.0281708	0.0233827	0.0180512	0.0254039	0.0180721	0.0163562	0.0223114	0.0202443	0.0163745	0.0248145	0.0105626	0.0107568	0.0114754	0.00797362	0.00780445	0.0113952
H	0.269804	0.251284	0.261692	0.0842592	0.0784226	0.0892862	0.0765607	0.0934042	0.0905215	0.0340856	0.031617	0.0380657	0.0421163	0.0609061	0.0641918	0.0259502	0.0271471	0.0297213	0.0461535	0.0678086	0.0805012	0.0150481	0.0158028	0.0156319	0.0149656	0.0151172	0.0209076
I	0.108021	0.113076	0.102837	0.0742303	0.0631861	0.0683901	0.0511889	0.046945	0.0533914	0.0288569	0.0210358	0.0293021	0.0262339	0.0193333	0.0258768	0.0207711	0.0162678	0.0213795	0.0226785	0.016936	0.0240255	0.0115889	0.0106197	0.0114166	0.00892014	0.00684109	0.0106441
J	0.0610918	0.0498142	0.0681216	0.0550629	0.0439665	0.050577	0.0355001	0.0251099	0.0427672	0.0223968	0.0164533	0.0226042	0.0216677	0.0160834	0.0270747	0.022331	0.0190521	0.0236895	0.0244333	0.019316	0.0364139	0.0134534	0.0120646	0.0128743	0.0103051	0.00846451	0.0125186
fraction oxidized
	A	B	C	D	E	F	G	H	I	J
rep1	0.251016	0.859075	0.883223	0.967929	0.978944	0.2671	0.373177	0.61658	0.425873	0.342381
rep2	0.233197	0.867511	0.882203	0.975102	0.957935	0.234618	0.353896	0.635742	0.390241	0.281868
rep3	0.29272	0.828063	0.909234	0.966861	0.979934	0.30292	0.392746	0.662789	0.421129	0.373111

## Sheet: Figure 4—figure supplement 2
Figure 4—figure supplement 2
[dSpCas9] (nM)	EMSA, protospacer 6	FB, protospacer 6, rep1	FB, protospacer 6, rep2	FB, protospacer 6, rep3	FB, protospacer 5, pre-gapped, rep1	FB, protospacer 5, pre-gapped, rep2	FB, protospacer 5, pre-gapped, rep3
0	0	0	0	0	0	0	0
0.6	not collected	0.936983	0.933127	0.939962	0.59884	0.602031	0.799142
1.2	0.878242	0.938729	0.935024	0.939478	0.938667	0.936121	0.982157
2.3	0.924486	0.944125	0.942656	0.945805	0.981637	0.984613	0.985659
4.7	0.935273	0.951071	0.94621	0.940894	0.987278	0.986692	0.988154
9.4	0.946536	0.963881	0.958623	0.962997	0.988768	0.98841	0.988488
18.8	0.95862	0.974261	0.974097	0.977637	0.990162	0.989761	0.990169
37.5	0.971668	0.97933	0.977629	0.987166	0.989964	0.989447	0.989698
75	0.975036	0.986444	0.985762	0.98803	0.990838	0.989619	0.991547
150	0.980188	0.988274	0.98863	0.987874	0.990748	0.99038	0.991091
300	0.988392	0.989462	0.989296	0.984897	0.990749	0.988734	0.989579
600	0.9928	0.9922	0.992872	0.99143	0.989675	0.98922	0.988549

## Sheet: Figure 4—figure supplement 3
Figure 4—figure supplement 3
permanganate reactivity index
	T1			T2			T3			T4			T5			T6			T7			T8			T9
	Rep1	Rep2	Rep3	Rep1	Rep2	Rep3	Rep1	Rep2	Rep3	Rep1	Rep2	Rep3	Rep1	Rep2	Rep3	Rep1	Rep2	Rep3	Rep1	Rep2	Rep3	Rep1	Rep2	Rep3	Rep1	Rep2	Rep3
Seq1, A	0.830151	0.827645	0.823311	0.189831	0.184314	0.219745	0.142052	0.127131	0.166547	0.0548683	0.0519619	0.0717972	0.0477543	0.0380657	0.0703086	0.0287091	0.0343433	0.0369672	0.0405332	0.0362488	0.0715729	0.013815	0.0251788	0.0233446	0.0164286	0.0337278	0.0406095
Seq1, B	1.02912	1.00001	1.02469	0.689761	0.492395	0.664753	0.354595	0.27571	0.378807	0.145155	0.0908176	0.146876	0.0904675	0.0646584	0.106314	0.046399	0.0262986	0.0443655	0.0551489	0.0389557	0.0701336	0.0167308	0.0107947	0.0185276	0.0249612	0.0130933	0.028475
Seq1, C	0.302569	0.221827	0.239841	0.0907006	0.0777676	0.0925283	0.0726611	0.0859941	0.125421	0.0361088	0.0301794	0.0405656	0.037275	0.0505678	0.0968791	0.0295539	0.0251274	0.0318223	0.0410046	0.0544189	0.108848	0.0185775	0.0132953	0.0210817	0.0191605	0.0134311	0.0284034
Seq1, D	0.0559448	0.0472734	0.0637835	0.0536802	0.0378742	0.0483046	0.0345507	0.0228757	0.0400023	0.0217017	0.0124902	0.0207175	0.0212319	0.0147343	0.0245805	0.0225774	0.0150493	0.0217353	0.025625	0.0184558	0.0299656	0.0143853	0.00936942	0.0123388	0.0110975	0.005441	0.0112949
Seq2, A	0.353029	0.354137	0.428164	0.220237	0.17629	0.203314	0.164043	0.107111	0.146161	0.0624246	0.0636519	0.0818638	0.0820172	0.0355425	0.0698558	0.033356	0.0392941	0.05474	0.0880693	0.0315171	0.0695843	0.0158607	0.0271855	0.0371404	0.0218265	0.0361088	0.0652619
Seq2, B	0.815757	0.602345	0.733892	0.510611	0.322134	0.377607	0.291832	0.178469	0.279759	0.108411	0.066921	0.102901	0.0841146	0.0465286	0.0897128	0.037465	0.0247682	0.0395779	0.0556373	0.02835	0.0644129	0.0141613	0.0123731	0.0183029	0.0197929	0.0151303	0.0324685
Seq2, C	0.898519	0.721112	0.728318	0.169389	0.137405	0.160567	0.124878	0.123712	0.133693	0.0552704	0.0387593	0.056646	0.0423794	0.0488789	0.0631781	0.0305187	0.0258413	0.0323088	0.0373164	0.0525957	0.0759464	0.0157258	0.0138736	0.0181354	0.0183063	0.0148501	0.0244694
Seq2, D	0.152942	0.124304	0.170114	0.0402229	0.0316007	0.0346375	0.0342183	0.0293968	0.0437713	0.0251268	0.0184597	0.0229077	0.024787	0.0186945	0.0314349	0.0221696	0.0173733	0.0207565	0.0266791	0.0208586	0.0384325	0.0141903	0.0123379	0.0117606	0.0118615	0.00965968	0.0117719
Seq3, A	0.755919	0.650446	0.728695	0.318933	0.284329	0.337972	0.0998472	0.095547	0.112505	0.0687322	0.0630148	0.0843097	0.0357965	0.0280915	0.0389715	0.0376904	0.0301765	0.0457254	0.0195577	0.0225596	0.0310046	0.00584195	0.00784271	0.0121456	0.00642032	0.00657948	0.0108644
Seq3, B	0.971675	0.805494	0.918722	0.50569	0.390327	0.541392	0.184193	0.14419	0.187151	0.119161	0.0837519	0.133885	0.0517865	0.0354178	0.0560325	0.0486232	0.0313096	0.0554728	0.0217606	0.0130512	0.0226406	0.00558284	0.00499058	0.00731342	0.00666358	0.00529297	0.00930857
Seq3, C	0.261569	0.277048	0.268611	0.164468	0.173362	0.211719	0.0620613	0.0705897	0.0785473	0.0502182	0.0638993	0.0968539	0.0306192	0.031377	0.0394448	0.036325	0.0438854	0.0747843	0.0206621	0.0213153	0.0319566	0.00697334	0.0148722	0.030032	0.00707376	0.0110587	0.0257683
Seq3, D	0.089904	0.0844794	0.107066	0.0673841	0.0511275	0.0658443	0.0362048	0.0300735	0.0400328	0.0292309	0.0228192	0.0325024	0.0237864	0.0200637	0.0285714	0.0252325	0.0205289	0.0307155	0.0147823	0.0147353	0.0218283	0.00280706	0.00508036	0.00632927	0.00293525	0.00501014	0.00702531
Seq4, A	0.559452	0.549275	0.488644	0.291415	0.249981	0.285443	0.11598	0.1307	0.137255	0.0804055	0.064605	0.0969302	0.0415921	0.0529869	0.0625805	0.0431333	0.0320544	0.0606287	0.0230879	0.0401675	0.0564371	0.00579916	0.007832	0.0192673	0.00669466	0.00623024	0.0156682
Seq4, B	0.821062	0.738029	0.640168	0.454199	0.316324	0.416979	0.195342	0.151374	0.178338	0.12665	0.0748495	0.122759	0.0570923	0.0379378	0.0568453	0.0537371	0.0293939	0.0519868	0.0232935	0.0143261	0.0227962	0.00584159	0.00662542	0.00883572	0.00702818	0.00583971	0.00973189
Seq4, C	0.714753	0.644813	0.648248	0.350601	0.297134	0.354656	0.101385	0.0733299	0.093799	0.0682436	0.0696998	0.090795	0.0322271	0.0244696	0.033431	0.0335744	0.0445719	0.0547893	0.0154634	0.0145259	0.0202732	0.00528897	0.0160692	0.020394	0.00576765	0.0112653	0.0180597
Seq4, D	0.0629061	0.0558596	0.0598937	0.0509159	0.0477545	0.0547956	0.0204871	0.0187344	0.0198667	0.0195148	0.0190397	0.0249814	0.0160974	0.0147829	0.0173241	0.0208567	0.0197895	0.026132	0.0097575	0.00947649	0.0112343	0.00247615	0.00426622	0.00530705	0.0030433	0.00462168	0.00493783
fraction oxidized
	Seq1, A	Seq1, B	Seq1, C	Seq1, D	Seq2, A	Seq2, B	Seq2, C	Seq2, D	Seq3, A	Seq3, B	Seq3, C	Seq3, D	Seq4, A	Seq4, B	Seq4, C	Seq4, D
rep1	0.883223	0.978944	0.639224	0.336717	0.805743	0.952667	0.888287	0.425609	0.880357	0.950949	0.634858	0.368779	0.840868	0.935807	0.876251	0.277025
rep2	0.882203	0.957935	0.594009	0.250968	0.746124	0.870208	0.843223	0.359185	0.846049	0.907739	0.671636	0.329498	0.832191	0.885148	0.847807	0.263551
rep3	0.909234	0.979934	0.709571	0.349056	0.837968	0.935238	0.869438	0.455021	0.890013	0.952228	0.740826	0.414395	0.854134	0.906953	0.877634	0.297686

## Sheet: Figure 4—figure supplement 4
Figure 4—figure supplement 4
Cas12a-like
permanganate reactivity index
	T1			T2			T3			T4			T5			T6			T7			T8			T9
	Rep1	Rep2	Rep3	Rep1	Rep2	Rep3	Rep1	Rep2	Rep3	Rep1	Rep2	Rep3	Rep1	Rep2	Rep3	Rep1	Rep2	Rep3	Rep1	Rep2	Rep3	Rep1	Rep2	Rep3	Rep1	Rep2	Rep3
Column 1	0.830151	0.827645	0.823311	0.189831	0.184314	0.219745	0.142052	0.127131	0.166547	0.0548683	0.0519619	0.0717972	0.0477543	0.0380657	0.0703086	0.0287091	0.0343433	0.0369672	0.0405332	0.0362488	0.0715729	0.013815	0.0251788	0.0233446	0.0164286	0.0337278	0.0406095
Column 2	1.02912	1.00001	1.02469	0.689761	0.492395	0.664753	0.354595	0.27571	0.378807	0.145155	0.0908176	0.146876	0.0904675	0.0646584	0.106314	0.046399	0.0262986	0.0443655	0.0551489	0.0389557	0.0701336	0.0167308	0.0107947	0.0185276	0.0249612	0.0130933	0.028475
Column 3	1.10141	0.93272	0.917837	0.509437	0.433407	0.435442	0.303799	0.224924	0.285741	0.106841	0.0815807	0.104277	0.078977	0.048213	0.0776289	0.034371	0.0275975	0.0320935	0.0482194	0.0325613	0.0502881	0.0132089	0.0127639	0.0152155	0.0175752	0.0116226	0.0208892
Column 4	1.26124	1.25039	1.17752	0.723936	0.554685	0.665587	0.404306	0.302253	0.395221	0.146503	0.100584	0.1397	0.0992329	0.0617713	0.102084	0.0425364	0.0287204	0.0409094	0.053237	0.0290445	0.0585661	0.0129053	0.0133125	0.0166124	0.0210112	0.0131683	0.025816
fraction oxidized
	Column 1	Column 2	Column 3	Column 4
rep1	0.883223	0.978944	0.96935	0.987127
rep2	0.882203	0.957935	0.941698	0.975416
rep3	0.909234	0.979934	0.952788	0.98388
Cas9-like
permanganate reactivity index
	T1			T2			T3			T4			T5			T6			T7			T8			T9
	Rep1	Rep2	Rep3	Rep1	Rep2	Rep3	Rep1	Rep2	Rep3	Rep1	Rep2	Rep3	Rep1	Rep2	Rep3	Rep1	Rep2	Rep3	Rep1	Rep2	Rep3	Rep1	Rep2	Rep3	Rep1	Rep2	Rep3
pre-gapped/bubbled revPdp5	0.302569	0.221827	0.239841	0.0907006	0.0777676	0.0925283	0.0726611	0.0859941	0.125421	0.0361088	0.0301794	0.0405656	0.037275	0.0505678	0.0968791	0.0295539	0.0251274	0.0318223	0.0410046	0.0544189	0.108848	0.0185775	0.0132953	0.0210817	0.0191605	0.0134311	0.0284034
pre-gapped/bubbled revPdp5, + RNA mimic	0.0559448	0.0472734	0.0637835	0.0536802	0.0378742	0.0483046	0.0345507	0.0228757	0.0400023	0.0217017	0.0124902	0.0207175	0.0212319	0.0147343	0.0245805	0.0225774	0.0150493	0.0217353	0.025625	0.0184558	0.0299656	0.0143853	0.00936942	0.0123388	0.0110975	0.005441	0.0112949
revPdp5 naked R-loop, + RNA, 5'-OH (IDT)	0.0612003	0.0581432	0.062576	0.0529049	0.0464669	0.0461353	0.0323981	0.0307885	0.0374773	0.0195444	0.0166673	0.0199645	0.0186836	0.0190696	0.0220226	0.0198522	0.0194231	0.0205286	0.0224179	0.021111	0.0287457	0.0122961	0.0116715	0.0113293	0.00903651	0.00716089	0.0112552
revPdp5 naked R-loop, + RNA, 5'-phos	0.137768	0.146984	0.135501	0.0631715	0.0558979	0.0572643	0.0545748	0.0529813	0.0540995	0.0250312	0.0210174	0.0248929	0.024186	0.0243536	0.0274628	0.0221769	0.0201171	0.0216525	0.0249992	0.0252911	0.0339459	0.0128409	0.0121042	0.011494	0.010187	0.00791505	0.0110214
fraction oxidized
	Column 1	Column 2	Column 3	Column 4
rep1	0.639224	0.336717	0.323578	0.445805
rep2	0.594009	0.250968	0.304321	0.43854
rep3	0.709571	0.349056	0.335923	0.447895

## Sheet: Figure 4—figure supplement 5
Figure 4—figure supplement 5
permanganate reactivity index
	T1			T2			T3			T4			T5			T6			T7			T8			T9
	Rep1	Rep2	Rep3	Rep1	Rep2	Rep3	Rep1	Rep2	Rep3	Rep1	Rep2	Rep3	Rep1	Rep2	Rep3	Rep1	Rep2	Rep3	Rep1	Rep2	Rep3	Rep1	Rep2	Rep3	Rep1	Rep2	Rep3
Column 1	0.624682	0.621582	0.592848	0.143483	0.146164	0.116042	0.123562	0.123695	0.122676	0.0425876	0.0440265	0.0318375	0.0555651	0.0526592	0.0555312	0.0227153	0.0233032	0.0181437	0.0539029	0.0531697	0.0588709	0.0114593	0.0118309	0.00952509	0.0119697	0.013245	0.00922501
Column 2	0.824549	0.852764	0.803636	0.396531	0.402845	0.365213	0.254658	0.249226	0.253455	0.09118	0.0903599	0.0837782	0.0770729	0.0729901	0.0762942	0.0317436	0.0315178	0.0285178	0.052321	0.0554437	0.0559906	0.0130158	0.0137691	0.013144	0.0179995	0.0182398	0.0168095
Column 3	0.0768078	0.0727193	0.0790416	0.0325661	0.026705	0.0309789	0.0374995	0.0345772	0.0391313	0.0206653	0.0182845	0.0183892	0.0323213	0.0294769	0.0333702	0.0175346	0.0167187	0.0166039	0.0396265	0.0353953	0.0393785	0.0105193	0.0104771	0.00975324	0.0103632	0.010353	0.00955306
Column 4	0.226844	0.237772	0.230122	0.0970333	0.0943873	0.087079	0.0762185	0.0715387	0.0719546	0.0370278	0.0347627	0.0323312	0.0412841	0.0400532	0.0353759	0.0265444	0.0260762	0.0253565	0.0466754	0.0456383	0.0371548	0.0171015	0.017662	0.013771	0.0216753	0.020927	0.0180597
Column 5	0.5719	0.587686	0.591926	0.316605	0.281896	0.302712	0.222486	0.219173	0.229826	0.0891006	0.0780881	0.0840352	0.0802913	0.077846	0.0835449	0.0342072	0.0279484	0.033834	0.0632506	0.0626976	0.0687194	0.0188062	0.0157351	0.0177966	0.0273558	0.0207466	0.0277316
Column 6	0.033262	0.0340474	0.036327	0.035133	0.0348951	0.0344132	0.0301679	0.0303392	0.033993	0.0196204	0.0195167	0.0201333	0.0292958	0.0285284	0.0320643	0.0193116	0.0186751	0.0199299	0.0363083	0.0365328	0.0387807	0.0109263	0.0114685	0.0115252	0.0121315	0.0136243	0.0128577
fraction oxidized
	Column 1	Column 2	Column 3	Column 4	Column 5	Column 6
rep1	0.820182	0.937288	0.354343	0.605225	0.893725	0.299546
rep2	0.820111	0.94	0.33033	0.604238	0.884626	0.301165
rep3	0.797575	0.930833	0.352609	0.580096	0.896388	0.314671

## Sheet: Figure 4—figure supplement 6
Figure 4—figure supplement 6
permanganate reactivity index
	T1			T2			T3			T4			T5			T6			T7			T8			T9
	Rep1	Rep2	Rep3	Rep1	Rep2	Rep3	Rep1	Rep2	Rep3	Rep1	Rep2	Rep3	Rep1	Rep2	Rep3	Rep1	Rep2	Rep3	Rep1	Rep2	Rep3	Rep1	Rep2	Rep3	Rep1	Rep2	Rep3
Column 1	0.830151	0.827645	0.823311	0.189831	0.184314	0.219745	0.142052	0.127131	0.166547	0.0548683	0.0519619	0.0717972	0.0477543	0.0380657	0.0703086	0.0287091	0.0343433	0.0369672	0.0405332	0.0362488	0.0715729	0.013815	0.0251788	0.0233446	0.0164286	0.0337278	0.0406095
Column 2	1.02912	1.00001	1.02469	0.689761	0.492395	0.664753	0.354595	0.27571	0.378807	0.145155	0.0908176	0.146876	0.0904675	0.0646584	0.106314	0.046399	0.0262986	0.0443655	0.0551489	0.0389557	0.0701336	0.0167308	0.0107947	0.0185276	0.0249612	0.0130933	0.028475
Column 3	1.07925	1.33957	0.875946	0.276316	0.253723	0.262499	0.214055	0.205146	0.230244	0.0681159	0.0705248	0.0814575	0.0457907	0.0411456	0.0663771	0.0221587	0.0273267	0.0289955	0.0272196	0.031834	0.0540928	0.0113204	0.0184814	0.0186971	0.0120025	0.0284787	0.0300402
Column 4	0.811562	0.885138	0.578926	0.504363	0.42981	0.496892	0.32196	0.30608	0.310933	0.103537	0.0886064	0.121189	0.0646889	0.0616225	0.079912	0.0260599	0.0249029	0.0356963	0.0364386	0.0359362	0.04776	0.0110137	0.0102926	0.0136975	0.0126542	0.0110452	0.0221486
Column 5	0.302569	0.221827	0.239841	0.0907006	0.0777676	0.0925283	0.0726611	0.0859941	0.125421	0.0361088	0.0301794	0.0405656	0.037275	0.0505678	0.0968791	0.0295539	0.0251274	0.0318223	0.0410046	0.0544189	0.108848	0.0185775	0.0132953	0.0210817	0.0191605	0.0134311	0.0284034
Column 6	0.0559448	0.0472734	0.0637835	0.0536802	0.0378742	0.0483046	0.0345507	0.0228757	0.0400023	0.0217017	0.0124902	0.0207175	0.0212319	0.0147343	0.0245805	0.0225774	0.0150493	0.0217353	0.025625	0.0184558	0.0299656	0.0143853	0.00936942	0.0123388	0.0110975	0.005441	0.0112949
Column 7	0.656183	0.556103	0.499405	0.44286	0.411038	0.417483	0.216181	0.193299	0.258304	0.0735168	0.0680315	0.0926528	0.0575843	0.0527107	0.104342	0.0263875	0.0275835	0.0343443	0.0475034	0.0446144	0.0977558	0.0124567	0.0172625	0.018425	0.0146785	0.0229759	0.0349557
Column 8	0.0378664	0.0381476	0.039023	0.0427798	0.0431111	0.0424181	0.0248039	0.0259332	0.0298819	0.0159607	0.0167251	0.0166164	0.0144794	0.0164909	0.0202853	0.0139754	0.0162183	0.0165192	0.0155027	0.0180538	0.0275005	0.00824677	0.0107729	0.00876146	0.00504752	0.0072163	0.00940644
fraction oxidized
	Column 1	Column 2	Column 3	Column 4	Column 5	Column 6	Column 7	Column 8
rep1	0.883223	0.978944	0.937007	0.949152	0.639224	0.336717	0.912482	0.245167
rep2	0.882203	0.957935	0.958165	0.945945	0.594009	0.250968	0.888518	0.261628
rep3	0.909234	0.979934	0.925347	0.931948	0.709571	0.349056	0.913891	0.281967

## Sheet: Figure 4—figure supplement 7
Figure 4—figure supplement 7
top left panel
	A	B	C	D	E
rep1	0.187294	7.53516	0.603843	3.79528	3.93246
rep2	0.278892	7.3043	0.567937	3.83896	4.11271
rep3	0.0889429	7.44285	0.523247	3.73175	4.09961
top right panel	A	B	C	D	E
rep1	0.148183	7.06776	0.677805	4.16359	3.92661
rep2	0.22446	8.71179	0.547281	5.31092	4.43048
rep3	0.038728	7.84713	0.622942	5.02853	5.01642
bottom left panel	A	B	C	D	E
rep1	0.146139	2.82033	0.679624	2.64471	1.41449
rep2	0.263709	3.3492	0.750919	2.32135	1.45511
rep3	0.0974947	3.49763	0.590257	2.70652	1.23912
bottom right panel	A	B	C	D	E
rep1	0.168412	16.4665	2.49021	4.05568	3.08788
rep2	0.280556	16.6701	2.62762	4.86148	3.55349
rep3	0.150786	18.4004	3.05002	4.87273	3.60129
