# Supplementary material for: CRISPR-Cas12a exploits R-loop asymmetry to form double-strand breaks
Source: eLife. 2020 Jun 10;9:e55143. doi: 10.7554/eLife.55143 (PMC7286691; doi:10.7554/eLife.55143)
Supplement: Figure 5—source data 1. [file elife-55143-fig5-data1.xlsx]

## Sheet: Figure 5A
Figure 5A
	3' R-loop boundary	5' R-loop boundary
rep1	44.85	53.69
rep2	44.9	53.54
rep3	44.52	53.51

## Sheet: Figure 5B
Figure 5B
See Figure 5—Source Data 2

## Sheet: Figure 5—figure supplement 1
Figure 5—figure supplement 1
DNA:DNA hairpin only				RNA:DNA hairpin only, RNA-3'				RNA:DNA hairpin only, RNA-5'				juxtaposed hairpins, RNA-3'	REP1		juxtaposed hairpins, RNA-3'	REP2		juxtaposed hairpins, RNA-3'	REP3			juxtaposed hairpins, RNA-5'	REP1		juxtaposed hairpins, RNA-5'	REP2		juxtaposed hairpins, RNA-5'	REP3
temperature (°C)	A260			temperature (°C)	A260			temperature (°C)	A260			temperature (°C)	A260		temperature (°C)	A260		temperature (°C)	A260			temperature (°C)	A260		temperature (°C)	A260		temperature (°C)	A260
94.97	0.383244			94.97	0.375334			94.97	0.381585			94.97	0.751077		94.92	0.736145		94.97	0.733092			94.97	0.782075		94.97	0.781406		94.97	0.77929
94.47	0.382963			94.47	0.375077			94.47	0.381036			94.47	0.750431		94.47	0.734897		94.47	0.732829			94.47	0.781294		94.42	0.779698		94.47	0.779239
93.97	0.38259			93.97	0.375929			93.97	0.381842			93.97	0.751039		93.97	0.736128		93.97	0.734222			93.97	0.781707		93.97	0.780988		93.97	0.779717
93.47	0.383494			93.47	0.376027			93.47	0.381771			93.47	0.751291		93.47	0.736088		93.47	0.734856			93.47	0.781615		93.47	0.780966		93.47	0.779548
92.97	0.383907			92.97	0.375677			92.97	0.381043			92.97	0.751316		92.97	0.735365		92.97	0.73421			92.97	0.781612		92.97	0.77977		92.97	0.779094
92.47	0.383753			92.47	0.375921			92.47	0.381309			92.47	0.751412		92.42	0.735944		92.47	0.734584			92.42	0.781726		92.47	0.780318		92.47	0.778955
91.97	0.384359			91.97	0.375707			91.97	0.381574			91.97	0.751292		91.97	0.736273		91.97	0.734626			91.92	0.781715		91.97	0.78025		91.97	0.779211
91.47	0.384881			91.47	0.376162			91.47	0.381654			91.47	0.752057		91.47	0.73697		91.47	0.735027			91.47	0.781654		91.47	0.780779		91.47	0.779696
90.97	0.384846			90.97	0.376322			90.97	0.381748			90.92	0.751732		90.97	0.737004		90.97	0.73492			90.97	0.781975		90.97	0.780759		90.97	0.779781
90.47	0.38488			90.47	0.37608			90.47	0.381265			90.47	0.751398		90.47	0.737087		90.5	0.735035			90.47	0.781776		90.47	0.780324		90.47	0.779337
89.97	0.384763			89.97	0.37611			89.97	0.381408			89.97	0.751434		89.97	0.73657		89.97	0.735071			89.97	0.781517		89.97	0.779621		89.97	0.77907
89.47	0.384893			89.47	0.375899			89.47	0.381336			89.47	0.751673		89.47	0.737449		89.47	0.735178			89.47	0.78204		89.49	0.780124		89.47	0.779065
88.97	0.384824			88.97	0.375987			88.97	0.381946			88.97	0.751432		88.92	0.737069		88.97	0.734528			88.97	0.781752		88.97	0.780383		88.97	0.779215
88.47	0.384051			88.47	0.375373			88.47	0.380612			88.42	0.750626		88.47	0.736758		88.47	0.733883			88.47	0.781018		88.47	0.779315		88.47	0.778366
87.97	0.384877			87.97	0.375971			87.97	0.381696			87.97	0.751152		87.97	0.735058		87.97	0.734387			87.97	0.78157		87.97	0.780103		87.92	0.778944
87.47	0.384744			87.47	0.375826			87.47	0.381107			87.47	0.751057		87.47	0.737173		87.47	0.734492			87.47	0.781577		87.47	0.77943		87.47	0.779133
86.97	0.384779			86.97	0.375863			86.97	0.381536			86.97	0.751032		86.97	0.736691		86.97	0.734383			86.97	0.781759		86.97	0.779235		86.97	0.778723
86.47	0.384976			86.47	0.375784			86.47	0.38156			86.47	0.751222		86.47	0.737004		86.47	0.734326			86.47	0.781447		86.47	0.77924		86.47	0.778709
85.97	0.384979			85.97	0.376111			85.97	0.381615			85.97	0.751196		85.97	0.737154		85.97	0.735057			85.97	0.781336		85.97	0.779656		85.97	0.778931
85.47	0.384842			85.47	0.375717			85.47	0.381586			85.47	0.751058		85.47	0.736902		85.47	0.735202			85.47	0.780908		85.47	0.77943		85.47	0.778729
84.97	0.384328			84.97	0.375009			84.97	0.3808			84.97	0.750067		84.97	0.736396		84.97	0.733704			84.97	0.78051		84.97	0.778867		84.97	0.777532
84.47	0.385057			84.5	0.37586			84.47	0.381596			84.47	0.750818		84.42	0.737377		84.47	0.73319			84.47	0.781068		84.49	0.778362		84.47	0.778699
83.97	0.384583			83.97	0.375613			83.97	0.381433			83.97	0.75093		83.97	0.736463		83.97	0.734269			83.97	0.781237		83.97	0.778683		83.97	0.778658
83.47	0.384382			83.47	0.375298			83.47	0.381063			83.49	0.750349		83.47	0.736805		83.47	0.734038			83.47	0.780629		83.47	0.777112		83.47	0.778054
82.97	0.384731			82.97	0.37538			82.97	0.381496			82.92	0.750561		82.97	0.736938		82.97	0.733979			82.97	0.781038		82.97	0.778877		82.97	0.77841
82.47	0.384636			82.47	0.375577			82.47	0.381152			82.47	0.750239		82.47	0.73627		82.47	0.733867			82.47	0.78098		82.47	0.778837		82.47	0.777874
81.97	0.384526			81.97	0.375113			82	0.381026			81.97	0.749863		81.97	0.735325		81.97	0.733825			81.97	0.780576		81.97	0.777165		81.97	0.777985
81.42	0.383978			81.47	0.374704			81.42	0.380446			81.47	0.749348		81.47	0.736118		81.47	0.733256			81.47	0.77994		81.47	0.777322		81.47	0.776784
80.97	0.383901			80.97	0.374866			80.97	0.380826			80.97	0.749463		80.97	0.736081		80.97	0.733291			80.97	0.77999		80.99	0.778579		80.97	0.777653
80.47	0.383255			80.47	0.374189			80.47	0.380459			80.47	0.748866		80.47	0.735621		80.47	0.732587			80.47	0.779255		80.47	0.777755		80.47	0.776943
79.97	0.384313			79.97	0.375072			79.97	0.381431			79.97	0.750136		79.97	0.736789		79.97	0.733246			79.97	0.780175		79.97	0.777591		79.97	0.778057
79.47	0.383813			79.47	0.375012			79.5	0.381019			79.47	0.749259		79.47	0.736248		79.47	0.73311			79.47	0.779852		79.47	0.778198		79.47	0.777477
78.97	0.383243			78.97	0.374153			78.97	0.380701			78.97	0.749579		78.97	0.73573		78.97	0.731703			78.97	0.779248		78.97	0.776353		78.97	0.7772
78.47	0.383844			78.47	0.374694			78.47	0.381022			78.47	0.749183		78.47	0.735508		78.47	0.732792			78.47	0.779655		78.47	0.777551		78.47	0.776932
77.97	0.383989			77.97	0.374528			77.97	0.38087			77.97	0.749043		77.97	0.73479		77.97	0.73264			77.97	0.779375		77.97	0.777432		77.97	0.776976
77.47	0.384043			77.47	0.374862			77.47	0.380769			77.47	0.748605		77.47	0.736239		77.47	0.732434			77.47	0.779604		77.47	0.777381		77.47	0.77709
76.97	0.383718			76.97	0.374446			76.97	0.380822			76.97	0.748606		76.97	0.735769		76.97	0.732331			76.97	0.779		76.97	0.777458		76.97	0.776922
76.47	0.383939			76.42	0.37455			76.47	0.380685			76.47	0.748778		76.47	0.736076		76.47	0.73223			76.47	0.779116		76.47	0.776848		76.47	0.776632
75.92	0.383723			75.97	0.374286			75.97	0.380472			75.92	0.748239		75.97	0.735787		76	0.731432			75.97	0.778923		75.97	0.776334		75.97	0.776088
75.47	0.383659			75.47	0.374638			75.47	0.380705			75.47	0.748111		75.47	0.733471		75.47	0.732189			75.42	0.778906		75.47	0.776984		75.47	0.776536
74.97	0.383063			74.97	0.373943			74.97	0.380273			74.97	0.747814		74.97	0.734765		74.97	0.731281			74.97	0.778091		74.97	0.776382		74.97	0.775878
74.47	0.38331			74.47	0.373682			74.47	0.380284			74.47	0.747264		74.47	0.734944		74.47	0.731192			74.47	0.777568		74.47	0.77633		74.42	0.775343
73.97	0.382925			73.97	0.373365			73.97	0.379903			73.97	0.747073		73.97	0.734949		73.97	0.73084			73.97	0.777407		73.97	0.776076		73.92	0.77537
73.47	0.383391			73.49	0.373534			73.5	0.380006			73.47	0.747042		73.47	0.735651		73.47	0.730809			73.47	0.777287		73.47	0.775598		73.47	0.775149
72.97	0.382754			72.97	0.373276			72.97	0.379585			72.97	0.746252		72.97	0.734861		72.97	0.730523			72.97	0.776759		72.97	0.775763		72.97	0.774627
72.47	0.383269			72.47	0.373533			72.47	0.379984			72.47	0.746359		72.47	0.735074		72.47	0.730087			72.47	0.776963		72.47	0.7754		72.47	0.77462
71.97	0.382575			71.97	0.373184			71.97	0.379354			71.97	0.745864		71.97	0.733972		71.97	0.730086			71.97	0.776571		71.92	0.774811		71.97	0.774088
71.42	0.382058			71.47	0.372424			71.47	0.378622			71.42	0.744877		71.47	0.733821		71.52	0.727986			71.47	0.775535		71.47	0.772827		71.47	0.773521
70.97	0.382704			70.97	0.372809			71	0.379256			70.97	0.745394		70.97	0.734362		70.97	0.729717			71	0.775913		70.97	0.774207		70.97	0.773543
70.47	0.382825			70.47	0.372723			70.47	0.379076			70.47	0.745382		70.47	0.734214		70.47	0.72906			70.47	0.775609		70.47	0.774069		70.47	0.773489
69.97	0.382852			70	0.372692			69.97	0.379142			69.97	0.745081		69.97	0.733764		70	0.729084			69.97	0.775176		69.97	0.773923		69.97	0.77321
69.47	0.381965			69.47	0.372174			69.47	0.378361			69.47	0.744423		69.47	0.733588		69.47	0.728481			69.47	0.774232		69.47	0.773151		69.42	0.77207
68.97	0.382067			68.97	0.372196			68.97	0.378234			68.97	0.744948		68.97	0.733291		68.97	0.728179			68.97	0.77397		68.97	0.772556		68.97	0.771833
68.47	0.382129			68.47	0.37181			68.47	0.377736			68.47	0.743723		68.47	0.732914		68.47	0.726849			68.5	0.773439		68.47	0.772257		68.47	0.77164
67.97	0.381779			67.97	0.371473			67.97	0.377758			67.97	0.743391		67.97	0.733115		67.92	0.727049			67.97	0.772801		67.92	0.771696		67.97	0.770862
67.42	0.381138			67.47	0.370827			67.47	0.377161			67.47	0.742601		67.47	0.732023		67.47	0.72631			67.42	0.771927		67.47	0.769798		67.47	0.769738
66.97	0.381303			66.97	0.370809			66.97	0.376927			66.92	0.742046		66.97	0.732038		66.97	0.72607			66.97	0.771547		66.97	0.770306		66.97	0.769486
66.47	0.381365			66.47	0.370089			66.47	0.376944			66.47	0.741923		66.47	0.731565		66.47	0.72456			66.47	0.770629		66.5	0.769133		66.47	0.765734
65.97	0.381132			65.97	0.370614			65.97	0.37678			65.97	0.741765		65.97	0.731652		65.97	0.725476			65.97	0.76997		65.97	0.768886		65.97	0.768223
65.47	0.380873			65.47	0.370066			65.47	0.376644			65.47	0.740855		65.47	0.731387		65.47	0.725077			65.47	0.769082		65.47	0.768134		65.47	0.767758
64.97	0.380876			64.97	0.370013			64.97	0.376052			64.97	0.740331		64.97	0.730552		64.97	0.724564			64.97	0.768247		64.97	0.76716		64.97	0.766529
64.47	0.380297			64.47	0.369175			64.47	0.375332			64.47	0.739683		64.47	0.729898		64.47	0.723223			64.47	0.766953		64.47	0.76581		64.47	0.765098
63.97	0.380272			63.99	0.368726			63.97	0.375236			63.97	0.738797		63.97	0.729672		63.97	0.72311			63.97	0.766173		63.92	0.764645		63.97	0.764293
63.47	0.380966			63.47	0.369335			63.47	0.375378			63.47	0.739373		63.47	0.729648		63.47	0.723414			63.47	0.765441		63.47	0.764324		63.47	0.764084
62.97	0.380176			62.92	0.368581			62.97	0.374797			62.97	0.73815		62.97	0.729131		62.92	0.721824			62.97	0.763763		62.97	0.762912		62.97	0.76243
62.47	0.380335			62.47	0.368314			62.47	0.374455			62.47	0.737252		62.47	0.728626		62.47	0.722411			62.42	0.76251		62.47	0.761774		62.47	0.761319
61.97	0.379641			61.97	0.367274			61.97	0.373121			61.97	0.736246		61.97	0.727765		61.97	0.720561			61.97	0.760707		61.97	0.760075		61.97	0.759393
61.47	0.379738			61.47	0.366979			61.47	0.372823			61.47	0.735389		61.5	0.727253		61.47	0.719728			61.47	0.758895		61.47	0.756149		61.47	0.757878
60.97	0.37897			60.97	0.366344			60.97	0.371978			60.97	0.734126		60.97	0.726017		60.97	0.718725			60.97	0.756659		60.97	0.756114		60.97	0.755616
60.47	0.378707			60.47	0.365852			60.42	0.37092			60.47	0.73358		60.47	0.725161		60.47	0.718261			60.47	0.754596		60.47	0.754444		60.47	0.754041
59.97	0.378527			59.97	0.365229			59.97	0.370201			59.97	0.732555		59.97	0.724136		59.97	0.71666			59.97	0.752628		59.92	0.750695		59.97	0.751519
59.47	0.378043			59.47	0.364256			59.47	0.369503			59.47	0.731454		59.47	0.723427		59.47	0.715166			59.47	0.74985		59.47	0.749517		59.47	0.748719
58.97	0.378242			59	0.364187			58.97	0.368802			58.97	0.730961		58.97	0.723212		58.97	0.715266			58.97	0.748166		58.97	0.747745		59.01	0.747001
58.47	0.378232			58.47	0.363635			58.47	0.368149			58.47	0.729576		58.47	0.722133		58.47	0.713851			58.47	0.744703		58.47	0.744578		58.47	0.74482
57.97	0.37806			57.97	0.363008			57.97	0.367492			57.97	0.728194		57.97	0.721094		57.97	0.713133			57.97	0.742349		57.97	0.741647		57.97	0.741576
57.47	0.377636			57.47	0.362397			57.47	0.366127			57.47	0.726946		57.47	0.720315		57.47	0.711336			57.47	0.738867		57.42	0.738308		57.47	0.738134
56.97	0.376985			56.97	0.361357			56.97	0.365258			56.97	0.726382		56.97	0.718667		56.97	0.710082			56.97	0.735114		56.97	0.734718		56.97	0.73474
56.47	0.376461			56.47	0.360368			56.47	0.363701			56.47	0.723847		56.47	0.717367		56.47	0.708568			56.47	0.731158		56.47	0.731052		56.47	0.73077
55.97	0.3762			55.97	0.35945			55.97	0.362959			55.97	0.722502		55.97	0.716168		55.97	0.707095			55.97	0.727303		55.97	0.727134		55.97	0.72755
55.47	0.376093			55.47	0.358798			55.47	0.361815			55.5	0.721877		55.5	0.714474		55.47	0.705259			55.47	0.723493		55.47	0.723599		55.51	0.723473
54.97	0.37526			54.97	0.357619			54.97	0.360249			54.97	0.718916		54.97	0.713441		54.97	0.704096			54.97	0.718757		54.97	0.718801		54.92	0.718855
54.47	0.374928			54.47	0.356536			54.47	0.358945			54.47	0.71714		54.47	0.711673		54.47	0.702116			54.47	0.714531		54.47	0.714365		54.47	0.713241
53.97	0.374976			53.97	0.356057			53.97	0.358298			53.97	0.715497		53.97	0.710682		53.97	0.701086			53.99	0.710243		53.97	0.709867		53.97	0.710262
53.47	0.373838			53.47	0.354762			53.47	0.356465			53.47	0.713106		53.47	0.708753		53.47	0.698579			53.47	0.705366		53.42	0.705794		53.47	0.705948
52.97	0.37375			52.97	0.35354			52.97	0.355068			52.97	0.711508		52.97	0.707084		52.97	0.697048			52.97	0.700961		52.97	0.701323		52.97	0.701754
52.47	0.373345			52.47	0.352727			52.47	0.354006			52.47	0.709729		52.47	0.705791		52.47	0.695464			52.47	0.696569		52.47	0.696953		52.47	0.69735
51.97	0.372657			51.97	0.351654			51.97	0.352737			51.97	0.707797		51.97	0.703882		51.97	0.693433			51.97	0.692494		51.97	0.692901		51.97	0.693397
51.47	0.372084			51.47	0.350685			51.47	0.351334			51.47	0.706497		51.47	0.702253		51.47	0.691336			51.47	0.688049		51.47	0.689029		51.47	0.688854
50.97	0.3716			50.97	0.349505			50.97	0.349927			50.97	0.703763		50.97	0.700106		50.97	0.689554			50.97	0.684207		50.97	0.684599		50.92	0.685351
50.51	0.371202			50.47	0.349049			50.47	0.349068			50.42	0.701385		50.47	0.699025		50.47	0.68813			50.47	0.680617		50.47	0.681023		50.47	0.681634
49.97	0.370532			49.97	0.347601			49.97	0.347539			49.97	0.69949		49.97	0.696745		49.97	0.68545			49.97	0.676992		49.97	0.677207		49.97	0.677488
49.47	0.370005			49.47	0.34666			49.47	0.346601			49.47	0.696986		49.49	0.695347		49.47	0.683382			49.47	0.673556		49.47	0.674008		49.47	0.674288
48.97	0.369193			48.97	0.345266			48.97	0.345355			48.97	0.695057		48.97	0.693203		48.97	0.681316			48.97	0.670358		48.97	0.670018		48.97	0.671138
48.47	0.36792			48.47	0.343714			48.47	0.343616			48.47	0.691997		48.47	0.690491		48.47	0.678565			48.47	0.666463		48.47	0.667016		48.47	0.66739
48.01	0.367383			47.97	0.3432			47.97	0.34281			47.97	0.690568		47.97	0.689454		47.97	0.676881			47.97	0.664219		47.97	0.664662		47.97	0.665169
47.47	0.367022			47.47	0.34228			47.47	0.3422			47.47	0.688072		47.47	0.687294		47.47	0.674547			47.47	0.661698		47.47	0.661596		47.47	0.66231
46.97	0.366248			46.97	0.341543			46.97	0.341013			46.97	0.685752		46.97	0.685473		46.97	0.672616			46.97	0.659393		46.97	0.659652		46.97	0.660273
46.47	0.365363			46.47	0.340207			46.47	0.33974			46.47	0.683393		46.47	0.683108		46.47	0.669948			46.47	0.656931		46.47	0.657511		46.47	0.657807
45.97	0.364241			45.97	0.339628			45.97	0.338928			45.97	0.68121		45.97	0.681441		45.97	0.667746			45.97	0.65476		45.97	0.655228		45.97	0.655255
45.47	0.362133			45.47	0.337456			45.47	0.336915			45.47	0.67724		45.47	0.677989		45.47	0.663967			45.47	0.651666		45.47	0.652084		45.47	0.652196
44.97	0.362755			44.97	0.337807			44.97	0.33717			44.97	0.675922		44.97	0.677146		44.97	0.663346			44.97	0.651045		44.97	0.65175		44.92	0.651947
44.47	0.361049			44.42	0.336747			44.47	0.336541			44.47	0.673633		44.47	0.674894		44.47	0.660698			44.47	0.649419		44.47	0.649788		44.47	0.649779
43.97	0.360565			43.97	0.336149			43.97	0.3357			43.97	0.671368		43.97	0.672769		43.97	0.658518			43.97	0.647928		43.97	0.648076		43.97	0.648667
43.47	0.359345			43.47	0.335214			43.47	0.33499			43.47	0.668363		43.42	0.670126		43.47	0.656414			43.47	0.646315		43.47	0.647142		43.47	0.64692
42.97	0.358413			42.97	0.334759			42.97	0.334196			42.97	0.666101		42.97	0.668125		42.97	0.652387			42.98	0.645315		42.97	0.645367		42.97	0.645941
42.47	0.357259			42.47	0.33413			42.47	0.33374			42.47	0.663786		42.47	0.66629		42.47	0.650861			42.47	0.6441		42.47	0.644765		42.47	0.644877
42	0.356028			41.97	0.333378			41.97	0.33316			41.97	0.661437		41.97	0.663852		41.97	0.648904			41.97	0.642935		41.99	0.643039		41.97	0.643594
41.47	0.355121			41.47	0.33283			41.47	0.332261			41.47	0.65888		41.47	0.662182		41.47	0.646607			41.47	0.641729		41.47	0.642044		41.47	0.642743
40.97	0.353789			40.97	0.332289			40.97	0.332198			40.98	0.656066		41	0.659036		40.97	0.643789			40.97	0.64068		40.97	0.641322		40.97	0.641257
40.47	0.352794			40.47	0.331926			40.47	0.331581			40.47	0.654405		40.47	0.657915		40.47	0.641685			40.47	0.64023		40.47	0.640518		40.47	0.641194
39.97	0.350887			39.97	0.331134			39.97	0.3314			39.97	0.651386		39.97	0.654104		39.97	0.639386			39.97	0.639034		39.97	0.639499		39.97	0.639562
39.51	0.349686			39.47	0.330669			39.47	0.330319			39.47	0.649346		39.42	0.653123		39.47	0.636818			39.47	0.638104		39.47	0.637117		39.47	0.63841
38.97	0.34842			38.97	0.330267			38.97	0.330361			38.97	0.647163		38.97	0.651168		38.97	0.635093			38.97	0.637574		38.97	0.638107		38.97	0.638005
38.47	0.347077			38.47	0.330081			38.47	0.329309			38.47	0.644868		38.47	0.649649		38.47	0.632484			38.47	0.636519		38.47	0.636376		38.47	0.636498
37.97	0.345948			37.97	0.329453			37.97	0.329308			37.97	0.641926		37.97	0.646732		37.97	0.63011			37.97	0.636014		37.97	0.636484		37.97	0.636205
37.47	0.344646			37.47	0.329424			37.47	0.328702			37.47	0.640645		37.47	0.646539		37.47	0.628054			37.47	0.63551		37.47	0.636012		37.47	0.635938
36.97	0.343175			36.97	0.328858			36.97	0.328084			36.97	0.638071		36.97	0.644342		37	0.625883			37.01	0.634318		36.97	0.634738		36.97	0.635248
36.47	0.342368			36.47	0.328745			36.47	0.328274			36.47	0.635995		36.47	0.642727		36.47	0.623408			36.47	0.634087		36.47	0.634644		36.47	0.633154
35.97	0.340929			35.97	0.328374			35.97	0.328028			35.97	0.633718		36	0.640843		35.97	0.621394			35.97	0.633517		35.97	0.633964		35.97	0.634281
35.47	0.339774			35.47	0.328362			35.47	0.327693			35.47	0.632419		35.47	0.639036		35.47	0.621087			35.47	0.633443		35.47	0.633854		35.47	0.634126
34.97	0.338717			34.97	0.328168			34.97	0.327236			34.97	0.631417		34.97	0.638331		34.97	0.618572			34.97	0.632689		34.97	0.633149		34.97	0.633243
34.42	0.337256			34.47	0.327639			34.47	0.326978			34.47	0.628402		34.47	0.635431		34.47	0.617062			34.47	0.63194		34.47	0.632614		34.47	0.632322
33.97	0.335941			33.97	0.327462			33.97	0.32664			33.97	0.626904		33.97	0.635139		33.97	0.614694			33.97	0.631722		33.97	0.631895		33.97	0.632361
33.5	0.334869			33.47	0.326933			33.47	0.32641			33.47	0.624952		33.47	0.632703		33.42	0.61249			33.47	0.630655		33.5	0.629537		33.47	0.631004
32.97	0.334232			32.97	0.327486			32.97	0.326242			32.97	0.623871		32.97	0.632345		32.97	0.611997			32.97	0.630745		32.97	0.631363		32.97	0.631576
32.47	0.333016			32.47	0.327046			32.47	0.325941			32.5	0.622845		32.5	0.631973		32.47	0.611013			32.47	0.630568		32.47	0.631042		32.47	0.630637
31.97	0.331766			31.97	0.326803			32	0.325744			31.97	0.621106		31.92	0.630465		31.97	0.607531			31.97	0.629512		31.97	0.630047		31.97	0.630198
31.47	0.330994			31.47	0.326941			31.47	0.325856			31.47	0.620218		31.47	0.629825		31.47	0.606694			31.47	0.629437		31.47	0.630159		31.47	0.629576
30.97	0.329328			30.97	0.325736			30.97	0.32478			30.97	0.618373		30.97	0.628789		30.97	0.606489			31	0.628247		30.97	0.628448		30.97	0.629456
30.47	0.329177			30.47	0.326829			30.47	0.325591			30.47	0.61799		30.47	0.628716		30.47	0.604609			30.47	0.628757		30.47	0.629301		30.47	0.629493
29.97	0.327983			29.97	0.326175			29.97	0.324827			29.97	0.61639		30	0.62709		29.97	0.604951			29.92	0.627953		29.92	0.627562		29.97	0.62822
29.47	0.326955			29.47	0.326059			29.5	0.325204			29.47	0.616426		29.47	0.626585		29.47	0.603587			29.47	0.627997		29.47	0.627263		29.47	0.628463
28.97	0.327108			28.97	0.326558			28.97	0.325181			28.97	0.61576		28.97	0.62679		28.97	0.603493			28.97	0.62795		28.92	0.628571		28.97	0.628477
28.47	0.325961			28.47	0.326302			28.47	0.324497			28.47	0.614131		28.47	0.625439		28.42	0.602171			28.47	0.627103		28.47	0.627761		28.47	0.627295
27.97	0.324446			27.97	0.325392			27.97	0.323577			27.97	0.613468		27.97	0.624179		27.97	0.600964			27.92	0.626062		27.97	0.626704		27.97	0.626788
27.47	0.324333			27.47	0.325976			27.47	0.324169			27.47	0.612666		27.5	0.624545		27.47	0.601038			27.47	0.626399		27.49	0.626775		27.48	0.62734
26.97	0.324088			26.92	0.326241			26.97	0.324365			26.97	0.612293		26.92	0.624556		26.97	0.600343			26.97	0.626167		26.97	0.626564		26.92	0.62673
26.47	0.322803			26.47	0.325407			26.47	0.323221			26.49	0.610643		26.47	0.622978		26.47	0.59815			26.47	0.625538		26.47	0.625707		26.47	0.625583
25.97	0.323091			25.97	0.326082			26	0.32422			25.97	0.611257		25.97	0.622959		25.97	0.599104			25.97	0.625579		25.97	0.625957		25.97	0.625932
25.47	0.322229			25.47	0.325719			25.47	0.323846			25.47	0.610744		25.47	0.62318		25.47	0.598194			25.47	0.625304		25.47	0.626039		25.47	0.626064
24.97	0.321654			24.92	0.325684			24.97	0.323815			24.97	0.609833		24.97	0.622911		25	0.597675			24.97	0.625208		25	0.625464		24.97	0.625713
24.47	0.32122			24.47	0.325752			24.47	0.323428			24.47	0.609537		24.47	0.621781		24.47	0.597417			24.47	0.624834		24.47	0.625319		24.47	0.625771
23.97	0.320794			23.97	0.325912			23.97	0.323427			23.92	0.609025		23.97	0.621642		23.92	0.596178			23.97	0.624719		23.97	0.625281		23.92	0.624978
23.47	0.320534			23.47	0.325768			23.47	0.323105			23.47	0.608944		23.47	0.621857		23.47	0.596479			23.47	0.624434		23.47	0.621702		23.47	0.624593
22.97	0.319593			22.97	0.3254			22.97	0.323214			22.97	0.608408		22.97	0.62145		22.97	0.595876			22.97	0.623924		22.97	0.624599		22.97	0.624325
22.47	0.318347			22.5	0.324137			22.47	0.321393			22.47	0.606347		22.47	0.619541		22.5	0.593663			22.47	0.622345		22.47	0.622319		22.47	0.622971
21.97	0.318874			21.97	0.325168			21.97	0.322818			21.97	0.607168		21.97	0.62134		21.97	0.595367			21.97	0.623087		21.97	0.623128		21.97	0.623854
21.47	0.318739			21.47	0.325514			21.47	0.322576			21.47	0.60709		21.5	0.620868		21.47	0.595381			21.47	0.623083		21.5	0.623347		21.48	0.623924
20.97	0.318207			20.97	0.325172			20.97	0.322215			20.97	0.606271		20.97	0.62099		20.97	0.594355			20.97	0.622859		20.97	0.622677		20.97	0.622949
20.47	0.318183			20.47	0.325302			20.47	0.322633			20.47	0.607142		20.47	0.621111		20.47	0.593948			20.47	0.62279		20.47	0.623138		20.47	0.622114
19.97	0.317168			19.97	0.324714			20	0.32147			19.97	0.605567		19.97	0.619765		19.97	0.593476			19.97	0.621537		19.97	0.621784		19.97	0.622604
19.47	0.317747			19.47	0.32543			19.47	0.322392			19.47	0.605973		19.47	0.621113		19.47	0.593635			19.47	0.622096		19.47	0.622723		19.47	0.621868
18.97	0.317591			18.97	0.325605			18.97	0.321976			18.97	0.605718		18.97	0.621094		18.97	0.59371			18.97	0.621986		19	0.62263		18.97	0.622878
18.47	0.317503			18.47	0.325518			18.47	0.321895			18.47	0.606009		18.47	0.620193		18.47	0.592872			18.47	0.621823		18.47	0.622041		18.47	0.622216
17.97	0.31698			17.97	0.325597			17.92	0.322076			17.97	0.604816		17.97	0.62083		17.97	0.593116			17.97	0.62164		17.97	0.622281		17.92	0.621749
17.47	0.316708			17.47	0.325414			17.5	0.321609			17.47	0.604859		17.47	0.620511		17.47	0.592774			17.47	0.621269		17.47	0.621635		17.47	0.621601
16.97	0.316384			16.97	0.325394			16.97	0.321609			16.97	0.604946		16.97	0.620431		16.97	0.592582			16.97	0.620923		16.97	0.621381		16.97	0.622045
16.47	0.31651			16.47	0.325603			16.42	0.321606			16.47	0.604684		16.47	0.61891		16.5	0.591094			16.47	0.620544		16.5	0.621449		16.47	0.621751
15.97	0.31537			15.97	0.324273			15.97	0.3205			15.97	0.603371		15.97	0.61921		15.97	0.591452			15.97	0.619552		15.97	0.620015		15.97	0.620305
15.47	0.316064			15.47	0.325316			15.47	0.321571			15.47	0.603958		15.47	0.620463		15.47	0.59237			15.47	0.620329		15.47	0.620676		15.47	0.621027
14.97	0.315543			14.97	0.325176			14.97	0.321601			14.97	0.603675		14.97	0.619441		14.97	0.591543			14.97	0.619751		14.97	0.620276		14.97	0.618823
14.47	0.315038			14.47	0.324758			14.47	0.32113			14.47	0.602931		14.47	0.61895		14.47	0.589995			14.47	0.619097		14.42	0.619246		14.47	0.619748
13.97	0.315322			13.97	0.325336			13.92	0.321081			13.97	0.60305		13.97	0.620123		13.97	0.59069			13.97	0.61951		13.97	0.618149		13.97	0.619956
13.47	0.314994			13.47	0.324926			13.47	0.32074			13.47	0.603189		13.47	0.619064		13.47	0.590676			13.47	0.618972		13.47	0.61869		13.47	0.619789
12.97	0.315163			12.97	0.325274			12.97	0.320901			12.97	0.603145		12.97	0.619515		12.97	0.590636			12.97	0.618961		12.97	0.619018		12.99	0.618462
12.47	0.315012			12.47	0.325396			12.47	0.32115			12.47	0.602762		12.47	0.619832		12.47	0.591009			12.47	0.619068		12.47	0.61923		12.47	0.619526
11.97	0.314934			11.97	0.325024			11.97	0.320904			11.97	0.602402		11.97	0.61862		11.97	0.590463			11.97	0.618212		11.97	0.619202		11.97	0.61917
11.47	0.314605			11.47	0.325282			11.47	0.320788			11.47	0.602537		11.47	0.618195		11.47	0.589518			11.47	0.61826		11.47	0.618894		11.47	0.618305
10.97	0.314816			10.97	0.325481			10.97	0.321036			10.97	0.602948		10.97	0.619288		10.97	0.59085			10.97	0.618278		10.97	0.618301		10.97	0.619306
10.47	0.314424			10.47	0.325125			10.47	0.320648			10.47	0.601392		10.47	0.619506		10.47	0.589877			10.47	0.617456		10.47	0.61798		10.47	0.618307
9.97	0.314397			9.97	0.325317			9.97	0.320391			9.97	0.602127		9.97	0.618188		9.97	0.589858			9.97	0.617532		9.97	0.617754		9.97	0.617118
9.47	0.313884			9.47	0.325318			9.47	0.320577			9.47	0.601613		9.47	0.619327		9.47	0.589771			9.47	0.617459		9.47	0.61751		9.47	0.61755
8.97	0.31354			8.97	0.324709			8.97	0.31962			8.97	0.600293		8.97	0.617935		8.97	0.588951			8.97	0.61646		8.97	0.616829		8.97	0.616427
8.47	0.314337			8.47	0.325788			8.47	0.32053			8.47	0.601274		8.47	0.619016		8.47	0.589447			8.47	0.616992		8.47	0.617624		8.47	0.617347
7.97	0.312212			7.97	0.32387			7.97	0.318577			7.97	0.600788		7.97	0.617236		7.97	0.587539			7.97	0.614923		7.97	0.615438		8	0.615906
7.47	0.313307			7.47	0.32498			7.47	0.319202			7.47	0.600692		7.47	0.61863		7.47	0.588467			7.47	0.616105		7.47	0.616531		7.47	0.616769
6.97	0.313772			6.97	0.32543			6.97	0.319943			6.97	0.600491		6.97	0.618534		6.97	0.588446			6.97	0.616498		6.97	0.616921		6.97	0.617011
6.47	0.313627			6.47	0.325401			6.49	0.319883			6.47	0.600384		6.47	0.617994		6.47	0.588751			6.49	0.615831		6.47	0.616697		6.42	0.617028
5.97	0.313488			5.97	0.325151			5.97	0.319635			5.97	0.600385		5.97	0.618272		5.97	0.58745			5.97	0.615747		5.97	0.61612		5.97	0.616723
5.5	0.313475			5.47	0.325017			5.47	0.319537			5.47	0.600655		5.47	0.618605		5.47	0.587882			5.47	0.615286		5.42	0.61547		5.47	0.616166
4.97	0.313034			4.97	0.325066			4.97	0.319655			4.97	0.600115		4.97	0.618636		4.97	0.587997			4.97	0.615123		4.97	0.614882		4.97	0.616085
4.47	0.312861			4.47	0.324869			4.47	0.319299			4.47	0.599354		4.49	0.618367		4.47	0.588084			4.47	0.614752		4.47	0.615271		4.47	0.615429
3.97	0.312966			3.97	0.325201			3.97	0.318934			3.97	0.600586		3.97	0.618087		3.97	0.587982			3.97	0.614824		3.97	0.615175		3.97	0.615042
3.42	0.312055			3.47	0.324659			3.47	0.318536			3.47	0.599042		3.47	0.61724		3.47	0.587112			3.47	0.61417		3.47	0.614609		3.47	0.614832
2.97	0.311825			2.97	0.324048			2.97	0.317615			2.97	0.598442		2.97	0.61697		2.97	0.586044			2.97	0.613047		2.97	0.613952		2.97	0.613943
2.47	0.312059			2.47	0.324976			2.47	0.318346			2.47	0.599058		2.47	0.617405		2.47	0.587593			2.47	0.613575		2.47	0.614345		2.47	0.614414
1.97	0.312726			1.97	0.325124			1.97	0.318245			1.97	0.599256		1.97	0.61813		1.97	0.586097			1.97	0.613547		1.99	0.613632		1.97	0.615016

## Sheet: Figure 5—figure supplement 2
Figure 5—figure supplement 2
Original molecular dynamics trajectories available upon request.
