# Supplementary material for: CRISPR-Cas12a exploits R-loop asymmetry to form double-strand breaks
Source: eLife. 2020 Jun 10;9:e55143. doi: 10.7554/eLife.55143 (PMC7286691; doi:10.7554/eLife.55143)
Supplement: Supplementary file 1. [file elife-55143-supp1.xlsx]

## Sheet: Supp. Table 1
Supplementary Table 1. Protein expression plasmids
plasmid ID	protein product	plasmid sequence	sequence of final protein product
pJCC_039	WT FnCas12a	TTCTTGAAGACGAAAGGGCCTCGTGATACGCCTATTTTTATAGGTTAATGTCATGATAATAATGGTTTCTTAGACGTCAGGTGGCACTTTTCGGGGAAATGTGCGCGGAACCCCTATTTGTTTATTTTTCTAAATACATTCAAATATGTATCCGCTCATGAGACAATAACCCTGATAAATGCTTCAATAACATTGAAAAAGGAAGAGTATGAGTATTCAACATTTCCGTGTCGCCCTTATTCCCTTTTTTGCGGCATTTTGCCTTCCTGTTTTTGCTCACCCAGAAACGCTGGTGAAAGTAAAAGATGCTGAAGATCAGTTGGGTGCACGAGTGGGTTACATCGAACTGGATCTCAACAGCGGTAAGATCCTTGAGAGTTTTCGCCCCGAAGAACGTTT…	MSIYQEFVNKYSLSKTLRFELIPQGKTLENIKARGLILDDEKRAKDYKKAKQIIDKYHQFFIEEILSSVCISEDLLQNYSDVYFKLKKSDDDNLQKDFKSAKDTIKKQISEYIKDSEKFKNLFNQNLIDAKKGQESDLILWLKQSKDNGIELFKANSDITDIDEALEIIKSFKGWTTYFKGFHENRKNVYSSNDIPTSIIYRIVDDNLPKFLENKAKYESLKDKAPEAINYEQIKKDLAEELTFDIDYKTSEVNQRVFSLDEVFEIANFNNYLNQSGITKFNTIIGGKFVNGENTKRKGINEYINLYSQQINDKTLKKYKMSVLFKQILSDTESKSFVIDKLEDDSDVVTTMQSFYEQIAAFKTVEEKSIKETLSLLFDDLKAQKLDLSKIYFKNDKSL…
pJCC_058	FnCas12a D917A (dFnCas12a)	TTCTTGAAGACGAAAGGGCCTCGTGATACGCCTATTTTTATAGGTTAATGTCATGATAATAATGGTTTCTTAGACGTCAGGTGGCACTTTTCGGGGAAATGTGCGCGGAACCCCTATTTGTTTATTTTTCTAAATACATTCAAATATGTATCCGCTCATGAGACAATAACCCTGATAAATGCTTCAATAACATTGAAAAAGGAAGAGTATGAGTATTCAACATTTCCGTGTCGCCCTTATTCCCTTTTTTGCGGCATTTTGCCTTCCTGTTTTTGCTCACCCAGAAACGCTGGTGAAAGTAAAAGATGCTGAAGATCAGTTGGGTGCACGAGTGGGTTACATCGAACTGGATCTCAACAGCGGTAAGATCCTTGAGAGTTTTCGCCCCGAAGAACGTTT…	MSIYQEFVNKYSLSKTLRFELIPQGKTLENIKARGLILDDEKRAKDYKKAKQIIDKYHQFFIEEILSSVCISEDLLQNYSDVYFKLKKSDDDNLQKDFKSAKDTIKKQISEYIKDSEKFKNLFNQNLIDAKKGQESDLILWLKQSKDNGIELFKANSDITDIDEALEIIKSFKGWTTYFKGFHENRKNVYSSNDIPTSIIYRIVDDNLPKFLENKAKYESLKDKAPEAINYEQIKKDLAEELTFDIDYKTSEVNQRVFSLDEVFEIANFNNYLNQSGITKFNTIIGGKFVNGENTKRKGINEYINLYSQQINDKTLKKYKMSVLFKQILSDTESKSFVIDKLEDDSDVVTTMQSFYEQIAAFKTVEEKSIKETLSLLFDDLKAQKLDLSKIYFKNDKSL…
pJCC_067	SpCas9 D10A/H840A (dSpCas9)	GCGGTCCTCGCCGAAAATGACCCAGAGCGCTGCCGGCACCTGTCCTACGAGTTGCATGATAAAGAAGACAGTCATAAGTGCGGCGACGATAGTCATGCCCCGCGCCCACCGGAAGGAGCTGACTGGGTTGAAGGCTCTCAAGGGCATCGGTCGACGCTCTCCCTTATGCGACTCCTGCATTAGGAAGCAGCCCAGTAGTAGGTTGAGGCCGTTGAGCACCGCCGCCGCAAGGAATGGTGCATGCAAGGAGATGGCGCCCAACAGTCCCCCGGCCACGGGGCCTGCCACCATACCCACGCCGAAACAAGCGCTCATGAGCCCGAAGTGGCGAGCCCGATCTTCCCCATCGGTGATGTCGGCGATATAGGCGCCAGCAACCGCACCTGTGGCGCCGGTGAT…	SNAMDKKYSIGLAIGTNSVGWAVITDEYKVPSKKFKVLGNTDRHSIKKNLIGALLFDSGETAEATRLKRTARRRYTRRKNRICYLQEIFSNEMAKVDDSFFHRLEESFLVEEDKKHERHPIFGNIVDEVAYHEKYPTIYHLRKKLVDSTDKADLRLIYLALAHMIKFRGHFLIEGDLNPDNSDVDKLFIQLVQTYNQLFEENPINASGVDAKAILSARLSKSRRLENLIAQLPGEKKNGLFGNLIALSLGLTPNFKSNFDLAEDAKLQLSKDTYDDDLDNLLAQIGDQYADLFLAAKNLSDAILLSDILRVNTEITKAPLSASMIKRYDEHHQDLTLLKALVRQQLPEKYKEIFFDQSKNGYAGYIDGGASQEEFYKFIKPILEKMDGTEELLVKLNRE…
pJCC_074	WT AsCas12a	TTCTTGAAGACGAAAGGGCCTCGTGATACGCCTATTTTTATAGGTTAATGTCATGATAATAATGGTTTCTTAGACGTCAGGTGGCACTTTTCGGGGAAATGTGCGCGGAACCCCTATTTGTTTATTTTTCTAAATACATTCAAATATGTATCCGCTCATGAGACAATAACCCTGATAAATGCTTCAATAACATTGAAAAAGGAAGAGTATGAGTATTCAACATTTCCGTGTCGCCCTTATTCCCTTTTTTGCGGCATTTTGCCTTCCTGTTTTTGCTCACCCAGAAACGCTGGTGAAAGTAAAAGATGCTGAAGATCAGTTGGGTGCACGAGTGGGTTACATCGAACTGGATCTCAACAGCGGTAAGATCCTTGAGAGTTTTCGCCCCGAAGAACGTTT…	SNAMTQFEGFTNLYQVSKTLRFELIPQGKTLKHIQEQGFIEEDKARNDHYKELKPIIDRIYKTYADQCLQLVQLDWENLSAAIDSYRKEKTEETRNALIEEQATYRNAIHDYFIGRTDNLTDAINKRHAEIYKGLFKAELFNGKVLKQLGTVTTTEHENALLRSFDKFTTYFSGFYENRKNVFSAEDISTAIPHRIVQDNFPKFKENCHIFTRLITAVPSLREHFENVKKAIGIFVSTSIEEVFSFPFYNQLLTQTQIDLYNQLLGGISREAGTEKIKGLNEVLNLAIQKNDETAHIIASLPHRFIPLFKQILSDRNTLSFILEEFKSDEEVIQSFCKYKTLLRNENVLETAEALFNELNSIDLTHIFISHKKLETISSALCDHWDTLRNALYERRISE…
pJCC_075	AsCas12a D908A (dAsCas12a)	TTCTTGAAGACGAAAGGGCCTCGTGATACGCCTATTTTTATAGGTTAATGTCATGATAATAATGGTTTCTTAGACGTCAGGTGGCACTTTTCGGGGAAATGTGCGCGGAACCCCTATTTGTTTATTTTTCTAAATACATTCAAATATGTATCCGCTCATGAGACAATAACCCTGATAAATGCTTCAATAACATTGAAAAAGGAAGAGTATGAGTATTCAACATTTCCGTGTCGCCCTTATTCCCTTTTTTGCGGCATTTTGCCTTCCTGTTTTTGCTCACCCAGAAACGCTGGTGAAAGTAAAAGATGCTGAAGATCAGTTGGGTGCACGAGTGGGTTACATCGAACTGGATCTCAACAGCGGTAAGATCCTTGAGAGTTTTCGCCCCGAAGAACGTTT…	SNAMTQFEGFTNLYQVSKTLRFELIPQGKTLKHIQEQGFIEEDKARNDHYKELKPIIDRIYKTYADQCLQLVQLDWENLSAAIDSYRKEKTEETRNALIEEQATYRNAIHDYFIGRTDNLTDAINKRHAEIYKGLFKAELFNGKVLKQLGTVTTTEHENALLRSFDKFTTYFSGFYENRKNVFSAEDISTAIPHRIVQDNFPKFKENCHIFTRLITAVPSLREHFENVKKAIGIFVSTSIEEVFSFPFYNQLLTQTQIDLYNQLLGGISREAGTEKIKGLNEVLNLAIQKNDETAHIIASLPHRFIPLFKQILSDRNTLSFILEEFKSDEEVIQSFCKYKTLLRNENVLETAEALFNELNSIDLTHIFISHKKLETISSALCDHWDTLRNALYERRISE…
pJCC_076	AsCas12a R1226A	TTCTTGAAGACGAAAGGGCCTCGTGATACGCCTATTTTTATAGGTTAATGTCATGATAATAATGGTTTCTTAGACGTCAGGTGGCACTTTTCGGGGAAATGTGCGCGGAACCCCTATTTGTTTATTTTTCTAAATACATTCAAATATGTATCCGCTCATGAGACAATAACCCTGATAAATGCTTCAATAACATTGAAAAAGGAAGAGTATGAGTATTCAACATTTCCGTGTCGCCCTTATTCCCTTTTTTGCGGCATTTTGCCTTCCTGTTTTTGCTCACCCAGAAACGCTGGTGAAAGTAAAAGATGCTGAAGATCAGTTGGGTGCACGAGTGGGTTACATCGAACTGGATCTCAACAGCGGTAAGATCCTTGAGAGTTTTCGCCCCGAAGAACGTTT…	SNAMTQFEGFTNLYQVSKTLRFELIPQGKTLKHIQEQGFIEEDKARNDHYKELKPIIDRIYKTYADQCLQLVQLDWENLSAAIDSYRKEKTEETRNALIEEQATYRNAIHDYFIGRTDNLTDAINKRHAEIYKGLFKAELFNGKVLKQLGTVTTTEHENALLRSFDKFTTYFSGFYENRKNVFSAEDISTAIPHRIVQDNFPKFKENCHIFTRLITAVPSLREHFENVKKAIGIFVSTSIEEVFSFPFYNQLLTQTQIDLYNQLLGGISREAGTEKIKGLNEVLNLAIQKNDETAHIIASLPHRFIPLFKQILSDRNTLSFILEEFKSDEEVIQSFCKYKTLLRNENVLETAEALFNELNSIDLTHIFISHKKLETISSALCDHWDTLRNALYERRISE…
pJCC_083	WT Cas12i1	TTCTTGAAGACGAAAGGGCCTCGTGATACGCCTATTTTTATAGGTTAATGTCATGATAATAATGGTTTCTTAGACGTCAGGTGGCACTTTTCGGGGAAATGTGCGCGGAACCCCTATTTGTTTATTTTTCTAAATACATTCAAATATGTATCCGCTCATGAGACAATAACCCTGATAAATGCTTCAATAACATTGAAAAAGGAAGAGTATGAGTATTCAACATTTCCGTGTCGCCCTTATTCCCTTTTTTGCGGCATTTTGCCTTCCTGTTTTTGCTCACCCAGAAACGCTGGTGAAAGTAAAAGATGCTGAAGATCAGTTGGGTGCACGAGTGGGTTACATCGAACTGGATCTCAACAGCGGTAAGATCCTTGAGAGTTTTCGCCCCGAAGAACGTTT…	SNAMSNKEKNASETRKAYTTKMIPRSHDRMKLLGNFMDYLMDGTPIFFELWNQFGGGIDRDIISGTANKDKISDDLLLAVNWFKVMPINSKPQGVSPSNLANLFQQYSGSEPDIQAQEYFASNFDTEKHQWKDMRVEYERLLAELQLSRSDMHHDLKLMYKEKCIGLSLSTAHYITSVMFGTGAKNNRQTKHQFYSKVIQLLEESTQINSVEQLASIILKAGDCDSYRKLRIRCSRKGATPSILKIVQDYELGTNHDDEVNVPSLIANLKEKLGRFEYECEWKCMEKIKAFLASKVGPYYLGSYSAMLENALSPIKGMTTKNCKFVLKQIDAKNDIKYENEPFGKIVEGFFDSPYFESDTNVKWVLHPHHIGESNIKTLWEDLNAIHSKYEEDIASLSE…
pJCC_084	Cas12i1 D647A (dCas12i1)	TTCTTGAAGACGAAAGGGCCTCGTGATACGCCTATTTTTATAGGTTAATGTCATGATAATAATGGTTTCTTAGACGTCAGGTGGCACTTTTCGGGGAAATGTGCGCGGAACCCCTATTTGTTTATTTTTCTAAATACATTCAAATATGTATCCGCTCATGAGACAATAACCCTGATAAATGCTTCAATAACATTGAAAAAGGAAGAGTATGAGTATTCAACATTTCCGTGTCGCCCTTATTCCCTTTTTTGCGGCATTTTGCCTTCCTGTTTTTGCTCACCCAGAAACGCTGGTGAAAGTAAAAGATGCTGAAGATCAGTTGGGTGCACGAGTGGGTTACATCGAACTGGATCTCAACAGCGGTAAGATCCTTGAGAGTTTTCGCCCCGAAGAACGTTT…	SNAMSNKEKNASETRKAYTTKMIPRSHDRMKLLGNFMDYLMDGTPIFFELWNQFGGGIDRDIISGTANKDKISDDLLLAVNWFKVMPINSKPQGVSPSNLANLFQQYSGSEPDIQAQEYFASNFDTEKHQWKDMRVEYERLLAELQLSRSDMHHDLKLMYKEKCIGLSLSTAHYITSVMFGTGAKNNRQTKHQFYSKVIQLLEESTQINSVEQLASIILKAGDCDSYRKLRIRCSRKGATPSILKIVQDYELGTNHDDEVNVPSLIANLKEKLGRFEYECEWKCMEKIKAFLASKVGPYYLGSYSAMLENALSPIKGMTTKNCKFVLKQIDAKNDIKYENEPFGKIVEGFFDSPYFESDTNVKWVLHPHHIGESNIKTLWEDLNAIHSKYEEDIASLSE…

## Sheet: Supp. Table 2
Supplementary Table 2. Oligonucleotide sequences
dJCC_XXX			dmrJCC_XXX			rdJCC_XXX			rJCC_XXX
fully DNA oligonucleotides, all synthesized by Integrated DNA Technologies			DNA oligonucleotides with final (3′-most) two nucleotides as 2′-OMe/2′-OH, used for 3′ end radiolabeling, all synthesized by Integrated DNA Technologies			chimeric DNA/RNA oligonucleotides, all synthesized by IDT			fully RNA oligonucleotides
oligo ID	sequence		oligo ID	sequence		oligo ID	sequence		oligo ID	sequence	5′ substituent	3′ substituent	source
dJCC_024	GTCGAAATTAATACGACTCACTATAGG		dmrJCC_512	GTCATAATGATTTTATCTTCTGGATTGTTGTAAGCAGCATTTGAGCAAAAATCTGTTmGrC		rdJCC_812	CGAATGGTGArCrArUrUrCrG		rJCC_163	GGAAUAAUUUCUACUGUUGUAGAUUCUUCUGGAUUGUUGUAAGC	triphosphate	2′,3′-cyclic phosphate	IVT
dJCC_025	GGCTCTCCCTTAGCCATC		dmrJCC_513	GCAACAGATTTTTGCTCAAATGCTGCTTACAACAATCCAGAAGATAAAATCATTATGmArC		rdJCC_813	rCrGrArArUrGGTGACATTCG		rJCC_166	GGUUUAAUUUCUACUCUUGUAGAUUCUUCUGGAUUGUUGUAAGC	triphosphate	2′,3′-cyclic phosphate	IVT
dJCC_044	GGCTCTCCCTTAGCCATCCGAGTTTCCTCGGATGCCCAGGTCGGACCGCGAGGAGGTGGAGATGCCATGCCGACCC		dmrJCC_514	GGCATAGTGACTTTATCTTCTGGATTGTTGTAAGCTATATATAAGCACGAGCCTGTTmGrC		rdJCC_816	TATATTGACGAATATACGAATGGTGArCrArUrUrCrG		rJCC_389	GCUUACAACAAUCCAGAAGAGUUUUAGAGCUAUGCUGUUUUGGAAACAAAACAGCAUAGCAAGUUAAAAUAAGGCUAGUCCGUUAUCAACUUGAAAAAGUGGCACCGAGUCGGUGCUUUUUUU	OH	OH	IVT
dJCC_140	TCTATGAACTTGAGACCACCCCGGC		dmrJCC_515	GGCATAGTGACTCCTTCTTCTGGATTGTTGTAAGCTATATATAAGCACGAGCCTGTTmGrC		rdJCC_817	rCrGrArArUrGGTGACATTCGTATATTGACGAATATA		rJCC_412	UCUUCUGGAUUGUUGUAAGC	OH	2′,3′-cyclic phosphate	IVT
dJCC_145	GCCGGGGTGGTCTCAAGTTC		dmrJCC_516	GGCATAGTGACTTTAAGAAGACCTAACAACATTCGTATATATAAGCACGAGCCTGTTmGrC					rJCC_413	AGAAGACCUAACAACAUUCG	OH	2′,3′-cyclic phosphate	IVT
dJCC_163	AATACGACTCACTATAGGAATAATTTCTACTGTTGTAGATTCTTCTGGATTGTTGTAAGCGGGTCGGCATGGCATCTC		dmrJCC_743	/5Phos/GCTATATATAAGCACGAGCCTGTTmGrC					rJCC_414	GCUUACAACAAUCCAGAAGA	OH	2′,3′-cyclic phosphate	IVT
dJCC_189	AATACGACTCACTATAGGTTTAATTTCTACTCTTGTAGATTCTTCTGGATTGTTGTAAGCGGGTCGGCATGGCATCTC		dmrJCC_744	/5Phos/CGTATATATAAGCACGAGCCTGTTmGrC					rJCC_415	CGAAUGUUGUUAGGUCUUCU	OH	2′,3′-cyclic phosphate	IVT
dJCC_282	ATGCTGTTTTGGAAACAAAACAGCATAGCAAGTTAAAATAAGGCTAGTCCGTTATCAAC		dmrJCC_749	TATATATAAGCACGAGCCTGTTmGrC					rJCC_448	GGGAAUUUUUGUGCCCAUCGUUGGCACUCUUCUGGAUUGUUGUAAGC	triphosphate	2′,3′-cyclic phosphate	IVT
dJCC_283	AAAAAAAGCACCGACTCGGTGCCACTTTTTCAAGTTGATAACGGACTAGCCTT		dmrJCC_751	/5Phos/CGATATATATTGCACGAGCCTGTTmGrC					rJCC_481	GGGUCGGCAUGGCAUCUC	OH	OH	IVT
dJCC_300	/56-FAM/TTTTTTTTTT/3IABkFQ/		dmrJCC_753	GGCATAGTGACTTTATCTTCTGGATTGTTGTAAGCATATATATTGCACGAGCCTGTTmGrC					rJCC_518	GGAGAUGCCAUGCCGACCCGCAACAGAUUUUUGCUCA	triphosphate	OH	IVT
dJCC_338	AATACGACTCACTATAGGTTTAATTTCTACTCTTGTAGATTCTTCTGGATTGTTGTAA		dmrJCC_755	/5Phos/GCATATATATTGCACGAGCCTGTTmGrC					rJCC_519	GGAGAUGCCAUGCCGACCCGUCAUAAUGAUUUUAUCU	triphosphate	OH	IVT
dJCC_390	GTCGAAATTAATACGACTCACTATAGGGTAAGCCTGATGAGGCCTTCGGGCCG		dmrJCC_757	GGCATAGTGACTTTAAGAAGACCTAACAACATTCGATATATATTGCACGAGCCTGTTmGrC					rJCC_520	GGAGAUGCCAUGCCGACCCGCAACAGGCUCGUGCUUA	triphosphate	OH	IVT
dJCC_391	GAAAGCCGTAGCTTACAACAATCCAGAAGAGTTTTAGAGCTATGCTGTTTTGGAAACAA								rJCC_610	UCUUCUGGAUUGUUGUAAGC	OH	OH	IDT
dJCC_392	GATGAGGCCTTCGGGCCGAAACGGTGAAAGCCGTAGCTTACAAC								rJCC_611	UCUUCUGGAUUGUUGUAAGC/3Phos/	OH	phosphate	IDT
dJCC_393	GGCATAGTGACTTTATCTTCTGGATTGTTGTAAGCTATATATAAGCACGAGCCTGTTGC								rJCC_648	GGUUUAAUUUCUACUCUUGUAGAUCCGGCAAGCUGCCCGUGCCC	triphosphate	2′,3′-cyclic phosphate	IVT
dJCC_394	GCAACAGGCTCGTGCTTATATATAGCTTACAACAATCCAGAAGATAAAGTCACTATGCC		Key to IDT modifications:						rJCC_766	GCUUACAACAAUCCAGAAGA	OH	OH	IDT
dJCC_395	GGCATAGTGACTCCTTCTTCTGGATTGTTGTAAGCTATATATAAGCACGAGCCTGTTGC		*N	the linkage 5′ of N is phosphorothioate					rJCC_767	/5Phos/GCUUACAACAAUCCAGAAGA	phosphate	OH	IDT
dJCC_397	GGCATAGTGACTTTAAGAAGACCTAACAACATTCGTATATATAAGCACGAGCCTGTTGC		rN	the sugar of N is ribose					rJCC_768	GGUUUAAUUUCUACUCUUGUAGAUUCUUCUGGAUUGUUGUAACG	triphosphate	2′,3′-cyclic phosphate	IVT
dJCC_398	GCAACAGGCTCGTGCTTATATATACGAATGTTGTTAGGTCTTCTTAAAGTCACTATGCC		mN	the sugar of N is 2′-O-methyl ribose
dJCC_416	AATACGACTCACTATAGGAGAAGACTGATGAGGCCTTCGGGCCGAAACGGTGAAAGCCG		/5Phos/	5′-phosphate on terminal (5′) nucleotide								KEY	IDT:	RNA synthesized by Integrated DNA Technologies
dJCC_417	CCGAAACGGTGAAAGCCGTATCTTCTGGATTGTTGTAAGCGGGTCGGCATGGCATCTC		/3Phos/	3′-phosphate on terminal (3′) nucleotide									IVT:	RNA produced by in vitro transcription (see "OligoPrep" sheet)
dJCC_418	AATACGACTCACTATAGGTCTTCTCTGATGAGGCCTTCGGGCCGAAACGGTGAAAGCCG		/56-FAM/	5′ 6-FAM (fluorescein)
dJCC_419	CCGAAACGGTGAAAGCCGTAAGAAGACCTAACAACATTCGGGGTCGGCATGGCATCTC		/3IABkFQ/	3′ Iowa Black FQ quencher
dJCC_420	AATACGACTCACTATAGGGTAAGCCTGATGAGGCCTTCGGGCCGAAACGGTGAAAGCCG		/i2AmPr/	internal 2-aminopurine
dJCC_421	CCGAAACGGTGAAAGCCGTAGCTTACAACAATCCAGAAGAGGGTCGGCATGGCATCTC			all unannotated nucleobases are DNA (except for in rJCC_XXX oligos, which are all RNA)
dJCC_422	AATACGACTCACTATAGGCATTCGCTGATGAGGCCTTCGGGCCGAAACGGTGAAAGCCG
dJCC_423	CCGAAACGGTGAAAGCCGTACGAATGTTGTTAGGTCTTCTGGGTCGGCATGGCATCTC
dJCC_424	GTCATAATGATTTTATCTTCTGGATTGTTGTAAGCAGCATTTGAGCAAAAATCTGTTGC
dJCC_425	GCAACAGATTTTTGCTCAAATGCTGCTTACAACAATCCAGAAGATAAAATCATTATGAC
dJCC_431	GTCATAATGATTCCATCTTCTGGATTGTTGTAAGCAGCATTTGAGCAAAAATCTGTTGC
dJCC_432	GCAACAGATTTTTGCTCAAATGCTGCTTACAACAATCCAGAAGATGGAATCATTATGAC
dJCC_449	AATACGACTCACTATAGGGAATTTTTGTGCCCATCGTTGGCACTCTTCTG
dJCC_450	ATCGTTGGCACTCTTCTGGATTGTTGTAAGCGGGTCGGCATGGCATCTCC
dJCC_463	GTCATAATGATTTTATCTTCTGG*A*T*T*G*T
dJCC_464	/5Phos/G*C*AGCATTTGAGCAAAAATCTGTTGC
dJCC_465	/5Phos/T*G*T*A*A*G*C*AGCATTTGAGCAAAAATCTGTTGC
dJCC_466	GTCATAATGATTTTATCTTCTGG*A*T*T*G*T*T*G*T*A*A
dJCC_467	GTCATAATGATTTTATCTTCTGG*A*T*T*G*T*T*G
dJCC_468	/5Phos/T*A*A*G*C*AGCATTTGAGCAAAAATCTGTTGC
dJCC_469	GTCATAATGATTTTATCTTCTGG*A*T*T*G*T*T*G*T
dJCC_470	GTCATAATGATTTTATCTTCTGG*A*T*T*G*T*T
dJCC_471	/5Phos/A*G*C*AGCATTTGAGCAAAAATCTGTTGC
dJCC_472	/5Phos/C*AGCATTTGAGCAAAAATCTGTTGC
dJCC_473	GTCATAATGATTTTATCTTCTGG*A*T*T*G
dJCC_474	GTCATAATGATTTTATCTTCTGG*A*T*T*G*T*T*G*T*A*A*G*C*AGCATTTGAGCAAAAATCTGTTGC
dJCC_475	GCAACAGATTTTTGCT*C*A*A*A*T*G*C*T*G*C*TTACAACAATCCAGAAGATAAAATCATTATGAC
dJCC_476	GTCATAATGATTTTATCTTCTGGATTGT
dJCC_477	/5Phos/GCAGCATTTGAGCAAAAATCTGTTGC
dJCC_484	AATACGACTCACTATAGGCGACCCCTGATGAGGCCTTCGGGCCGAAACG
dJCC_485	GAGATGCCATGCCGACCCTACGGCTTTCACCGTTTCGGCCCGAAGGCC
dJCC_521	TGAGCAAAAATCTGTTGCGGGTCGGCATGGCATCTCCTATAGTGAGTCGTATT
dJCC_522	AGATAAAATCATTATGACGGGTCGGCATGGCATCTCCTATAGTGAGTCGTATT
dJCC_523	TAAGCACGAGCCTGTTGCGGGTCGGCATGGCATCTCCTATAGTGAGTCGTATT
dJCC_600	GGCATAGTGACTTTATCTTCTGGATTGT
dJCC_602	/5Phos/GCTATATATAAGCACGAGCCTGTTGC
dJCC_603	GGCATAGTGACTTTAAGAAGACCTAACA
dJCC_606	ACAATCCAGAAGAAGGAGTCACTATGCC
dJCC_607	GCAACAGGCTCGTGCTTATATATAGC
dJCC_609	GCAACAGGCTCGTGCTTATATATACG
dJCC_610	TCTTCTGGATTGTTGTAAGC
dJCC_645	GGCATAGTGACTTTATCTTCTGGATTGTTGTAACGTATATATAAGCACGAGCCTGTTGC
dJCC_646	GCAACAGGCTCGTGCTTATATATACGTTACAACAATCCAGAAGATAAAGTCACTATGCC
dJCC_654	AATACGACTCACTATAGGTTTAATTTCTACTCTTGTAGATCCGGCAAGCTG
dJCC_655	TGTAGATCCGGCAAGCTGCCCGTGCCCGGGTCGGCATGGCATCTC
dJCC_672	GGAAATCAACGCAGATATGTACTGGATCATGAGACGAAAC
dJCC_673	GTTTCGTCTCATGATCCAGTACATATCTGCGTTGATTTCC
dJCC_674	ACATATCTGCGTTGATTTCC
dJCC_675	GTTTCGTCTCATGATCCAGT
dJCC_676	GTTTCGTCTCATGATCCAG
dJCC_678	GTTTCGTCTCATGATCCA
dJCC_679	ATATCTGCGTTGATTTCC
dJCC_680	ATCTGCGTTGATTTCC
dJCC_681	GTTTCGTCTCATGATC
dJCC_682	GTTTCGTCTCATGATCCAGAACATATCTGCGTTGATTTCC
dJCC_685	GTTTCGTCTCATGATCCACATGATATCTGCGTTGATTTCC
dJCC_686	GTTTCGTCTCATGATCGTCATGTAATCTGCGTTGATTTCC
dJCC_687	GTTTCGTCTCATGATCCAGACATATCTGCGTTGATTTCC
dJCC_690	GTTTCGTCTCATGATCCAATATCTGCGTTGATTTCC
dJCC_691	GTTTCGTCTCATGATCATCTGCGTTGATTTCC
dJCC_704	GGCATAGTGACTTTATCTTCTGGATTGTTGTTTCGTATATATAAGCACGAGCCTGTTGC
dJCC_705	GCAACAGGCTCGTGCTTATATATACGAAACAACAATCCAGAAGATAAAGTCACTATGCC
dJCC_706	GGCATAGTGACTTTATCTTCTGGATTGTTCATTCGTATATATAAGCACGAGCCTGTTGC
dJCC_707	GCAACAGGCTCGTGCTTATATATACGAATGAACAATCCAGAAGATAAAGTCACTATGCC
dJCC_708	GGCATAGTGACTTTATCTTCTGGATTGAACATTCGTATATATAAGCACGAGCCTGTTGC
dJCC_709	GCAACAGGCTCGTGCTTATATATACGAATGTTCAATCCAGAAGATAAAGTCACTATGCC
dJCC_710	GCAACAGGCTCGTGCTTATATATA
dJCC_722	GGCATAGTGACTTTACCGGCAAGCTGC
dJCC_723	TAGGGCACGGGCAGCTTGCCGGTAAAGTCACTATGCC
dJCC_725	GCAACAGGCTCGTGCTTATATATACCTTACAACAATCCAGAAGATAAAGTCACTATGCC
dJCC_727	GCAACAGGCTCGTGCTTATATATACGATACAACAATCCAGAAGATAAAGTCACTATGCC
dJCC_728	GGCATAGTGACTTTATCTTCTGGTTTGTTGTAAGCTATATATAAGCACGAGCCTGTTGC
dJCC_729	GCAACAGGCTCGTGCTTATATATAGCTTACAACAAACCAGAAGATAAAGTCACTATGCC
dJCC_745	/5Phos/ACAATCCAGAAGAAGGAGTCACTATGCC
dJCC_746	/5Phos/TGTTAGGTCTTCTAGGAGTCACTATGCC
dJCC_747	/5Phos/TGTTAGGTCTTCTTAAAGTCACTATGCC
dJCC_748	/5Phos/ACAATCCAGAAGATAAAGTCACTATGCC
dJCC_750	GCAACAGGCTCGTGCAATATATATGCTTACAACAATCCAGAAGATAAAGTCACTATGCC
dJCC_752	GCAACAGGCTCGTGCAATATATATCG
dJCC_754	GCAACAGGCTCGTGCAATATATATCGAATGTTGTTAGGTCTTCTTAAAGTCACTATGCC
dJCC_756	GCAACAGGCTCGTGCAATATATATGC
dJCC_782	GAGATGCCATGCCGACCCCGTTACAACAATCCAGAAGA
dJCC_783	/56-FAM/TTTTTTTTTT
dJCC_784	TTTTTTTTTT/3IABkFQ/
dJCC_785	/5Phos/CTGCTTACAACAATCCAGAAGATAAAATCATTATGAC
dJCC_787	GCAACAGGCTCGTGCTTATATATACGAATCAACAATCCAGAAGATAAAGTCACTATGCC
dJCC_791	/5Phos/GCTATATATAAGCAAAAATCTGTTGC
dJCC_792	GCAACAGATTTTTGCTTATATATAGCTTACAACAATCCAGAAGATAAAATCATTATGAC
dJCC_793	/5Phos/GCGGCGCCGCAGCAAAAATCTGTTGC
dJCC_794	GCAACAGATTTTTGCTGCGGCGCCGCTTACAACAATCCAGAAGATAAAATCATTATGAC
dJCC_795	/5Phos/GCATAATATAAGCAAAAATCTGTTGC
dJCC_796	/5Phos/GCCCGGCCGCAGCAAAAATCTGTTGC
dJCC_797	/5Phos/GCTCGATTTGAGCAAAAATCTGTTGC
dJCC_798	GTCATAATGATTTTAAGAAGACCTAACA
dJCC_799	/5Phos/CGAGCATTTGAGCAAAAATCTGTTGC
dJCC_800	GCAACAGATTTTTGCTCAAATGCAGCTTACAACAATCCAGAAGATAAAATCATTATGAC
dJCC_801	/5Phos/CGTGCATTTGAGCAAAAATCTGTTGC
dJCC_802	/5Phos/TGTTAGGTCTTCTTAAAATCATTATGAC
dJCC_803	GCAACAGATTTTTGCTCAAATGCTCG
dJCC_804	GCAACAGATTTTTGCTCAAATGCACG
dJCC_805	GTCATAATGATTTTATCTTCTGGATTGTTGTAAGCTGCATTTGAGCAAAAATCTGTTGC
dJCC_806	/5Phos/CG/i2AmPr/GCATTTGAGCAAAAATCTGTTGC
dJCC_807	GCAACAGATTTTTGCTCAAATGC/i2AmPr/GCTTACAACAATCCAGAAGATAAAATCATTATGAC
dJCC_808	GTCATAATGATTTTATCTTCTGGATTGTTGTAAGC/i2AmPr/GCATTTGAGCAAAAATCTGTTGC
dJCC_809	GCAACAGATTTTTGCTCAAATGC/i2AmPr/CG
dJCC_818	TATATTGACGAATATA

## Sheet: Supp. Table 3
Supplementary Table 3. Oligonucleotides used in reagent generation
RNA oligos used for 3′ end radiolabeling
oligo ID	description
rJCC_481	phosphate shuttle RNA
rJCC_518	splint RNA for 3′-radiolabeling DNA oligos with a 3′ terminus equivalent to that of dmrJCC_512
rJCC_519	splint RNA for 3′-radiolabeling DNA oligos with a 3′ terminus equivalent to that of dmrJCC_513
rJCC_520	splint RNA for 3′-radiolabeling DNA oligos with a 3′ terminus equivalent to that of dmrJCC_514
DNA oligos used to assemble in vitro transcription templates
oligo ID	IVT template assembled by PCR (or single-step primer extension) from DNA oligos:	ribozyme(s) in initial transcript?
rJCC_163	dJCC_024, dJCC_163, dJCC_044, dJCC_025	HDVrz
rJCC_166	dJCC_024, dJCC_189, dJCC_044, dJCC_025	HDVrz
rJCC_389	dJCC_390, dJCC_392, dJCC_391, dJCC_282, dJCC_283	HHrz
rJCC_412	dJCC_024, dJCC_416, dJCC_417, dJCC_044, dJCC_025	HHrz, HDVrz
rJCC_413	dJCC_024, dJCC_418, dJCC_419, dJCC_044, dJCC_025	HHrz, HDVrz
rJCC_414	dJCC_024, dJCC_420, dJCC_421, dJCC_044, dJCC_025	HHrz, HDVrz
rJCC_415	dJCC_024, dJCC_422, dJCC_423, dJCC_044, dJCC_025	HHrz, HDVrz
rJCC_448	dJCC_024, dJCC_449, dJCC_450, dJCC_044, dJCC_025	HDVrz
rJCC_481	dJCC_024, dJCC_484, dJCC_485	HHrz
rJCC_518	dJCC_024, dJCC_521	x
rJCC_519	dJCC_024, dJCC_522	x
rJCC_520	dJCC_024, dJCC_523	x
rJCC_648	dJCC_024, dJCC_654, dJCC_655, dJCC_044, dJCC_025	HDVrz
rJCC_768	dJCC_024, dJCC_338, dJCC_782, dJCC_044, dJCC_025	HDVrz
	Key:	HHrz	hammerhead ribozyme on 5′ end of transcript
		HDVrz	hepatitis delta virus ribozyme on 3′ end of transcript
		dJCC_XXX	fully DNA oligonucleotide
		rJCC_XXX	fully RNA oligonucleotide

## Sheet: Supp. Table 4
Supplementary Table 4. Oligonucleotides used in experiments
KEY
dJCC_XXX	fully DNA oligonucleotide
rJCC_XXX	fully RNA oligonucleotide
rdJCC_XXX	chimeric DNA/RNA oligonucleotide
dmrJCC_XXX	DNA oligonucleotide with final (3′-most) two nucleotides as 2′-OMe/2′-OH, used for 3′ end radiolabeling
MAIN-TEXT FIGURES
FIGURE 2A	Oligo ID
NTS	dmrJCC_512
TS	dJCC_425
crRNA	rJCC_166
FIGURE 2B	Oligo ID
intact NTS	dmrJCC_514
cleaved NTS	dmrJCC_743, dJCC_600
TS	dJCC_394
crRNA	rJCC_166
FIGURE 3A	Oligo ID
DNA substrate 1, NTS	dmrJCC_743, dJCC_603
DNA substrate 1, TS	dJCC_394
DNA substrate 2, NTS	dmrJCC_744, dJCC_603
DNA substrate 2, TS	dJCC_646
crRNA	rJCC_166
FIGURE 3B	Oligo ID
substrate 1-20, NTS	dJCC_393
substrate 1-20, TS	dJCC_394
NTS for all starred (*) substrates	dJCC_397
substrate 1-20*, TS	dJCC_394
substrate 1-19*, TS	dJCC_725
substrate 1-18*, TS	dJCC_646
substrate 1-17*, TS	dJCC_727
substrate 1-16*, TS	dJCC_705
substrate 1-15*, TS	dJCC_787
substrate 1-14*, TS	dJCC_707
crRNA	rJCC_166
FIGURE 3C	Oligo ID
substrate A, NTS	dJCC_476, dJCC_791
substrate B, NTS	dJCC_476, dJCC_795
substrate C, NTS	dJCC_476, dJCC_477
substrate D, NTS	dJCC_476, dJCC_797
substrate E, NTS	dJCC_476, dJCC_793
substrate F, NTS	dJCC_476, dJCC_796
substrates A/B, TS	dJCC_792
substrates C/D, TS	dJCC_425
substrates E/F, TS	dJCC_794
crRNA	rJCC_166
FIGURE 4A	Oligo ID
Cas12a, TS	dJCC_394
Cas12a, columns 1 + 2, NTS	dmrJCC_743, dJCC_600
Cas12a, column 3, NTS	dmrJCC_744, dJCC_603
Cas12a, crRNA	rJCC_166
20-nt RNA spacer mimic, Cas12a-like R-loop (column 3)	rJCC_412
Cas9, TS	dmrJCC_515
Cas9, columns 4 + 5, NTS	dJCC_607, dJCC_745
Cas9, column 6, NTS	dJCC_609, dJCC_746
Cas9, sgRNA	rJCC_389
20-nt RNA spacer mimic, Cas9-like R-loop (column 6)	rJCC_414
FIGURE 5A	Oligo ID
nicked dumbbell, RNA-3′	rdJCC_816
nicked dumbbell, RNA-5′	rdJCC_817
APPENDIX 1—FIGURE 1	Oligo ID
radiolabeled strand for all experiments in this figure	dJCC_672
substrate b, unlabeled strand	dJCC_673
substrate c, unlabeled strands	dJCC_674, dJCC_675
substrate d, unlabeled strands	dJCC_674, dJCC_676
substrate e, unlabeled strands	dJCC_678, dJCC_679
substrate f, unlabeled strands	dJCC_680, dJCC_681
substrate g, unlabeled strand	dJCC_682
substrate h, unlabeled strand	dJCC_685
substrate i, unlabeled strand	dJCC_686
substrate j, unlabeled strand	dJCC_687
substrate k, unlabeled strand	dJCC_690
substrate l, unlabeled strand	dJCC_691
APPENDIX 2—FIGURE 1	Oligo ID
NTS, for 5′-radiolabeling	dJCC_424
NTS, for 3′-radiolabeling	dmrJCC_512
TS, for 5′-radiolabeling	dJCC_425
TS, for 3′-radiolabeling	dmrJCC_513
crRNA	rJCC_166
APPENDIX 2—FIGURE 2A	Oligo ID
TS	dJCC_425
intact NTS, fully PO	dJCC_424
intact NTS, PS tract	dJCC_474
NTS, nick	dJCC_467, dJCC_468
NTS, 1-nt gap	dJCC_468, dJCC_470
NTS, 2-nt gap	dJCC_463, dJCC_468
NTS, 3-nt gap	dJCC_470, dJCC_471
NTS, 4-nt gap	dJCC_463, dJCC_471
NTS, 5-nt gap	dJCC_471, dJCC_473
NTS, 6-nt gap	dJCC_464, dJCC_473
NTS, 7-nt gap	dJCC_472, dJCC_473
NTS, PAM-proximal fragment only	dJCC_473
crRNA	rJCC_166
APPENDIX 2—FIGURE 2B	Oligo ID
intact NTS	dJCC_424
pre-gapped NTS	dJCC_476, dJCC_477
TS	dJCC_425
Cas12a crRNA	rJCC_166
Cas12i crRNA	rJCC_448
SUPPLEMENTARY FIGURES
FIGURE 2—FIG. SUPP. 2	Oligo ID
protospacer 1, intact NTS	dJCC_424
protospacer 1, pre-gapped NTS	dJCC_476, dJCC_477
protospacer 1, TS	dJCC_425
protospacer 2, intact NTS	dJCC_393
protospacer 2, pre-gapped NTS	dJCC_600, dJCC_602
protospacer 2, TS	dJCC_394
crRNA	rJCC_166
FIGURE 2—FIG. SUPP. 3	Oligo ID
left panel, top strand (radiolabeled)	dJCC_398
left panel, bottom strand	dmrJCC_514
right panel, TS	dJCC_394
right panel, intact NTS	dmrJCC_514
right panel, pre-gapped NTS	dmrJCC_743, dJCC_600
right panel, crRNA	rJCC_166
FIGURE 3—FIG. SUPP. 1	Oligo ID
protospacer 2, NTS	dJCC_393
protospacer 2, TS	dJCC_394
protospacer 3, NTS	dmrJCC_743, dJCC_603
protospacer 3, TS	dJCC_394
protospacer 4, NTS	dmrJCC_744, dJCC_603
protospacer 4, TS	dJCC_646
DNA competitor oligos (see legend)	dJCC 140, dJCC_145
crRNA 3	rJCC_166
crRNA 4	rJCC_768
FIGURE 3—FIG. SUPP. 2	Oligo ID
see oligo IDs for Fig. 3—Fig. Supp. 1
FIGURE 3—FIG. SUPP. 3	Oligo ID
substrate 1-20, NTS	dJCC_393
substrate 1-20, TS	dJCC_394
substrate 1-18, NTS	dJCC_645
substrate 1-18, TS	dJCC_646
substrate 1-16, NTS	dJCC_704
substrate 1-16, TS	dJCC_705
substrate 1-14, NTS	dJCC_706
substrate 1-14, TS	dJCC_707
substrate 1-12, NTS	dJCC_708
substrate 1-12, TS	dJCC_709
crRNA	rJCC_166
FIGURE 3—FIG. SUPP. 4	Oligo ID
see oligo IDs for Fig. 3B
FIGURE 3—FIG. SUPP. 5	Oligo ID
substrate A/E, NTS	dJCC_393
substrate A/E, TS	dJCC_394
substrate B, NTS	dJCC_728
substrate B, TS	dJCC_729
substrate C/D, NTS	dJCC_645
substrate C/D, TS	dJCC_646
crRNA A/B/C	rJCC_166
crRNA D/E	rJCC_768
FIGURE 3—FIG. SUPP. 6	Oligo ID
see oligo IDs for Fig. 3B
FIGURE 3—FIG. SUPP. 7	Oligo ID
see oligo IDs for Fig. 3C
FIGURE 4—FIG. SUPP. 1	Oligo ID
pre-gapped protospacer 2, TS (columns A-E)	dJCC_394
pre-gapped protospacer 2, NTS (columns A,B)	dmrJCC_743, dJCC_600
pre-gapped/pre-unwound protospacer 2, NTS (columns C-E)	dmrJCC_744, dJCC_603
Cas12a crRNA	rJCC_166
20-nt RNA spacer mimic, Cas12a-like R-loop (column E)	rJCC_412
pre-gapped protospacer 5, TS (columns F-J)	dmrJCC_515
pre-gapped protospacer 5, NTS (columns F,G)	dJCC_607, dJCC_745
pre-gapped/pre-unwound protospacer 5, NTS (columns H-J)	dJCC_609, dJCC_746
Cas9 sgRNA	rJCC_389
20-nt RNA spacer mimic, Cas9-like R-loop (column J)	rJCC_414
FIGURE 4—FIG. SUPP. 2	Oligo ID
protospacer 6, NTS	dJCC_432
protospacer 6, TS	dJCC_431
pre-gapped protospacer 5, NTS	dJCC_606, dJCC_607
pre-gapped protospacer 5, TS	dJCC_395
sgRNA	rJCC_389
FIGURE 4—FIG. SUPP. 3	Oligo ID
Sequence 1, substrate A/B, top DNA strand	dJCC_394
Sequence 1, substrate A/B, bottom DNA strand	dJCC_603, dmrJCC_744
Sequence 1, substrate B, 20-nt RNA	rJCC_412
Sequence 1, substrate C/D, top DNA strand	dJCC_609, dJCC_747
Sequence 1, substrate C/D, bottom DNA strand	dmrJCC_514
Sequence 1, substrate D, 20-nt RNA	rJCC_414
Sequence 2, substrate A/B, top DNA strand	dJCC_398
Sequence 2, substrate A/B, bottom DNA strand	dJCC_600, dmrJCC_743
Sequence 2, substrate B, 20-nt RNA	rJCC_413
Sequence 2, substrate C/D, top DNA strand	dJCC_607, dJCC_748
Sequence 2, substrate C/D, bottom DNA strand	dmrJCC_516
Sequence 2, substrate D, 20-nt RNA	rJCC_415
Sequence 3, substrate A/B, top DNA strand	dJCC_750
Sequence 3, substrate A/B, bottom DNA strand	dJCC_603, dmrJCC_751
Sequence 3, substrate B, 20-nt RNA	rJCC_412
Sequence 3, substrate C/D, top DNA strand	dJCC_747, dJCC_752
Sequence 3, substrate C/D, bottom DNA strand	dmrJCC_753
Sequence 3, substrate D, 20-nt RNA	rJCC_414
Sequence 4, substrate A/B, top DNA strand	dJCC_754
Sequence 4, substrate A/B, bottom DNA strand	dJCC_600, dmrJCC_755
Sequence 4, substrate B, 20-nt RNA	rJCC_413
Sequence 4, substrate C/D, top DNA strand	dJCC_748, dJCC_756
Sequence 4, substrate C/D, bottom DNA strand	dmrJCC_757
Sequence 4, substrate D, 20-nt RNA	rJCC_415
FIGURE 4—FIG. SUPP. 4	Oligo ID
Cas12a-like, top DNA strand	dJCC_394
Cas12a-like, bottom DNA strand	dJCC_603, dmrJCC_744
Cas12a-like, 20-nt RNA, column 2	rJCC_412
Cas12a-like, 20-nt RNA, column 3	rJCC_610
Cas12a-like, 20-nt RNA, column 4	rJCC_611
Cas9-like, top DNA strand	dJCC_747, dJCC_609
Cas9-like, bottom DNA strand	dmrJCC_514
Cas9-like, 20-nt RNA, column 2	rJCC_414
Cas9-like, 20-nt RNA, column 3	rJCC_766
Cas9-like, 20-nt RNA, column 4	rJCC_767
FIGURE 4—FIG. SUPP. 5	Oligo ID
columns 1-3, left strand	dJCC_394
columns 1-3, right strand	dmrJCC_516
column 2, 20-nt RNA	rJCC_412
column 3, 20-nt RNA	rJCC_415
columns 4-6, left strand	dJCC_398
columns 4-6, right strand	dmrJCC_514
column 5, 20-nt RNA	rJCC_413
column 6, 20-nt RNA	rJCC_414
FIGURE 4—FIG. SUPP. 6	Oligo ID
columns 1-4, left strand	dJCC_394
columns 1-2, right strand	dJCC_603, dmrJCC_744
columns 3-4, right strand	dJCC_603, dmrJCC_749
columns 2/4, 20-nt RNA	rJCC_412
columns 5-8, right strand	dmrJCC_514
columns 5-6, left strand	dJCC_609, dJCC_747
columns 7-8, left strand	dJCC_710, dJCC_747
columns 6/8, 20-nt RNA	rJCC_414
FIGURE 4—FIG. SUPP. 7	Oligo ID
top-left panel, constructs A/D/E, left DNA strand	dJCC_425
top-left panel, construct A, right DNA strand	dJCC_798, dJCC_799
top-left panel, construct B	dJCC_806
top-left panel, construct C, left DNA strand	dJCC_803
top-left panel, construct C, right DNA strand	dJCC_806
top-left panel, constructs D/E, right DNA strand	dJCC_798, dJCC_806
top-left panel, constructs A/E, 20-nt RNA	rJCC_610
top-right panel, construct A, left DNA strand	dJCC_800
top-right panel, constructs A/D/E, right DNA strand	dJCC_798, dJCC_801
top-right panel, construct B	dJCC_807
top-right panel, constructs C/D/E, left DNA strand	dJCC_807
top-right panel, construct C, right DNA strand	dJCC_805
top-right panel, constructs A/E, 20-nt RNA	rJCC_610
bottom-left panel, constructs A/D/E, left DNA strand	dJCC_802, dJCC_803
bottom-left panel, construct A, right DNA strand	dJCC_424
bottom-left panel, construct B	dJCC_808
bottom-left panel, construct C, left DNA strand	dJCC_425
bottom-left panel, constructs C/D/E, right DNA strand	dJCC_808
bottom-left panel, constructs A/E, 20-nt RNA	rJCC_766
bottom-right panel, construct A, left DNA strand	dJCC_802, dJCC_804
bottom-right panel, constructs A/D/E, right DNA strand	dJCC_805
bottom-right panel, construct B	dJCC_809
bottom-right panel, construct C, left DNA strand	dJCC_809
bottom-right panel, construct C, right DNA strand	dJCC_801
bottom-right panel, constructs D/E, left DNA strand	dJCC_802, dJCC_809
bottom-right panel, constructs A/E, 20-nt RNA	rJCC_766
FIGURE 5—FIG. SUPP. 1	Oligo ID
DNA:DNA hairpin	dJCC_818
RNA:DNA hairpin, RNA-3′	rdJCC_812
RNA:DNA hairpin, RNA-5′	rdJCC_813
nicked dumbbell, RNA-3′	rdJCC_816
nicked dumbbell, RNA-5′	rdJCC_817
APPENDIX 1—FIGURE 1—FIG. SUPP. 1	Oligo ID
see oligo IDs for Appendix 1—Fig. 1
APPENDIX 2—FIGURE 1—FIG. SUPP. 1	Oligo ID
see oligo IDs for Appendix 2—Fig. 1 for substrate oligos
in ladder-generating reactions containing trans-active AsCas12a (see Materials and methods):
crRNA (for ladder generation)	rJCC_648
pre-cleaved DNA activator (for ladder generation)	dJCC_722, dJCC_723
APPENDIX 2—FIGURE 1—FIG. SUPP. 2	Oligo ID
reporter substrate, intact	dJCC_300
reporter substrate, pre-cleaved (used in equilibrium titrations to determine relationship between fraction cleaved and fluorescence intensity)	dJCC_783, dJCC_784
Cas12a activator (pre-cleaved), NTS	dJCC_722
Cas12a activator (pre-cleaved), TS	dJCC_723
Cas12a crRNA	rJCC_648
APPENDIX 2—FIGURE 1—FIG. SUPP. 3	Oligo ID
NTS	dJCC_424
TS	dJCC_425
crRNA	rJCC_166
APPENDIX 2—FIGURE 1—FIG. SUPP. 4	Oligo ID
radiolabeled trans ssDNA target	dJCC_672
NTS	dJCC_424
TS	dJCC_425
crRNA	rJCC_166
APPENDIX 2—FIGURE 1—FIG. SUPP. 5	Oligo ID
see oligo IDs for Appendix 2—Fig. 1
APPENDIX 2—FIGURE 1—FIG. SUPP. 6	Oligo ID
NTS, for 5′-radiolabeling	dJCC_424
NTS, for 3′-radiolabeling	dmrJCC_512
TS, for 5′-radiolabeling	dJCC_425
TS, for 3′-radiolabeling	dmrJCC_513
crRNA	rJCC_163
APPENDIX 2—FIGURE 2—FIG. SUPP. 1	Oligo ID
NTS, fully phosphodiester	dJCC_424
NTS, with phosphorothioate tract	dJCC_474
TS, fully phosphodiester	dJCC_425
TS, with phosphorothioate tract	dJCC_475
Cas12a crRNA	rJCC_166
Cas12i crRNA	rJCC_448
APPENDIX 2—FIGURE 2—FIG. SUPP. 2	Oligo ID
see oligo IDs for Appendix 2—Fig. 2—Fig. Supp. 1
APPENDIX 2—FIGURE 2—FIG. SUPP. 3	Oligo ID
see oligo IDs for Appendix 2—Fig. 2—Fig. Supp. 1
APPENDIX 2—FIGURE 2—FIG. SUPP. 4	Oligo ID
NTS variant A	dJCC_424
NTS variant B	dJCC_474
NTS variant C	dJCC_463, dJCC_465
NTS variant D	dJCC_467, dJCC_468
NTS variant E	dJCC_466, dJCC_464
NTS variant F	dJCC_473, dJCC_465
NTS variant G	dJCC_470, dJCC_468
NTS variant H	dJCC_469, dJCC_471
NTS variant I	dJCC_466, dJCC_472
NTS variant J	dJCC_463, dJCC_468
NTS variant K	dJCC_467, dJCC_471
NTS variant L	dJCC_469, dJCC_464
NTS variant M	dJCC_473, dJCC_468
NTS variant N	dJCC_470, dJCC_471
NTS variant O	dJCC_467, dJCC_464
NTS variant P	dJCC_469, dJCC_472
NTS variant Q	dJCC_463, dJCC_471
NTS variant R	dJCC_470, dJCC_464
NTS variant S	dJCC_467, dJCC_472
NTS variant T	dJCC_473, dJCC_471
NTS variant U	dJCC_463, dJCC_464
NTS variant V	dJCC_470, dJCC_472
NTS variant W	dJCC_473, dJCC_464
NTS variant X	dJCC_463, dJCC_472
NTS variant Y	dJCC_473, dJCC_472
NTS variant Z	dJCC_473
APPENDIX 2—FIGURE 2—FIG. SUPP. 5	Oligo ID
TS	dJCC_425
NTS variants	see oligo IDs for Appendix 2—Fig. 2—Fig. Supp. 4
crRNA	rJCC_166
APPENDIX 2—FIGURE 2—FIG. SUPP. 6	Oligo ID
see oligo IDs for Appendix 2—Fig. 2—Fig. Supp. 5
APPENDIX 2—FIGURE 2—FIG. SUPP. 7	Oligo ID
radiolabeled trans ssDNA target	dJCC_672
NTS, fully phosphodiester (PO)	dJCC_424
NTS, with phosphorothioate tract (PS)	dJCC_474
TS, fully phosphodiester (PO)	dJCC_425
TS, with phosphorothioate tract (PS)	dJCC_475
non-specific competitor ssDNA oligo (see figure legend)	dJCC_398
NTS (pc)	dJCC_476
TS (pc)	dJCC_785
substrates C-Y, TS	dJCC_475
substrates C-Y, NTS variants	see oligo IDs for Appendix 2—Fig. 2—Fig. Supp. 4
crRNA	rJCC_166
APPENDIX 2—FIGURE 2—FIG. SUPP. 8	Oligo ID
see oligo IDs for Appendix 2—Fig. 2B
APPENDIX 2—FIGURE 2—FIG. SUPP. 9	Oligo ID
NTS	dJCC_424
TS	dJCC_425
crRNA	rJCC_166
APPENDIX 2—FIGURE 2—FIG. SUPP. 10	Oligo ID
see oligo IDs for Appendix 2—Fig. 1
APPENDIX 2—FIGURE 2—FIG. SUPP. 11	Oligo ID
NTS, for 5′-radiolabeling	dJCC_424
NTS, for 3′-radiolabeling	dmrJCC_512
TS, for 5′-radiolabeling	dJCC_425
TS, for 3′-radiolabeling	dmrJCC_513
crRNA	rJCC_448
